# Supplementary material for: 1H-Imidazole-2,5-Dicarboxamides as NS4A Peptidomimetics: Identification of a New Approach to Inhibit HCV-NS3 Protease
Source: MDPI journal article supplement (doi:10.3390/biom10030479), 2020-03-21
Supplement: s1 [file s1]

## **1H-Imidazole-2,5-dicarboxamides as NS4A Peptidomimetics: Identification of a New Venue to Inhibit HCV-NS3 Protease**

Abdelsattar M. Omar<sup>a,b</sup>, Mahmoud A. El-Faky<sup>c</sup>, Stefan T. Arold<sup>d</sup>, Sameh H. Soror<sup>e,f</sup>, Maan T. Khayat<sup>a</sup>, Hani Z. Asfour<sup>g</sup>, Faida H. Bamane<sup>h</sup> and Moustafa E. El-Araby<sup>a\*</sup>

<sup>a</sup> *Department of Pharmaceutical Chemistry, Faculty of Pharmacy, King Abdulaziz University, Alsulaymaniyah, Jeddah 21589, Saudi Arabia*

<sup>b</sup> *Department of Pharmaceutical Chemistry, Faculty of Pharmacy, Al-Azhar University, Cairo, Egypt*

<sup>c</sup> *Department of Natural Products and Alternative Medicine, Faculty of Pharmacy, King Abdulaziz University, Alsulaymaniyah, Jeddah 21589, Saudi Arabia*

<sup>d</sup> *Computational Bioscience Research Center, Division of Biological and Environmental Sciences and Engineering, King Abdullah University of Science and Technology, Thuwal, Saudi Arabia*

<sup>e</sup> *Center for Scientific Excellence Helwan Structural Biology Research (HSBR), Faculty of Pharmacy, Helwan University, Ain Helwan, P.O. 11795, Cairo, Egypt*

<sup>f</sup> *Department of Biochemistry and Molecular Biology, Faculty of Pharmacy, Helwan University, Ain Helwan, P.O. 11795, Cairo, Egypt*

<sup>g</sup> *Department of Medical Microbiology and Parasitology, Faculty of Medicine, King Abdulaziz University, Jeddah 21589, Saudi Arabia*

<sup>h</sup> *Department of Biochemistry, Faculty of Medicine, King Abdulaziz University, Jeddah 21589, Saudi Arabia*

## S1. Superposition of NS4A in four different crystal structures

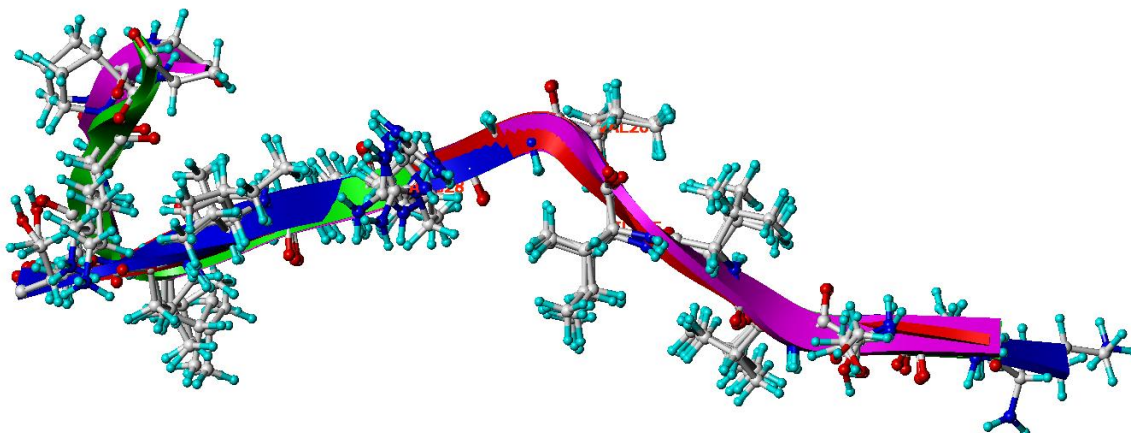

**Figure S1-A:** Conserved conformation of NS4A peptide in bound form with NS3 protease domain. Examples were downloaded from PDB website (rcsb.org) and illustrated as follows: 1A1R (Green), 2OC1 (magenta), 3OYP (Red) and 4U01 (Blue)

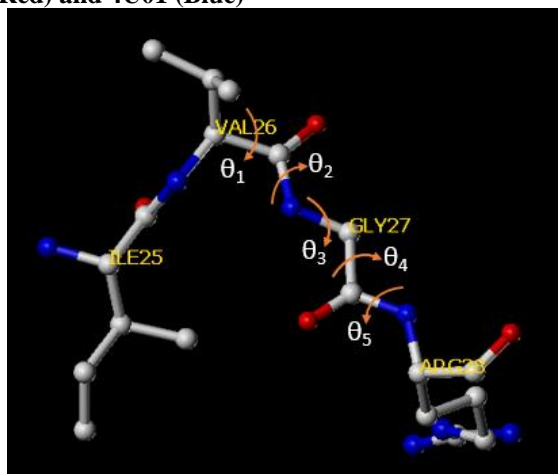

**Figure S1-B.** Dihedral angles  $\theta_n$  of the bound NS4A's planar region (PDB Code: 1NS3). Numerical values of  $\theta_1$  to  $\theta_5$  are listed in Table S1-A.

| Torsion    | Actual | Deviation from Plane |
|------------|--------|----------------------|
| $\theta_1$ | 13.9   | +13.9 (eclipsed cis) |
| $\theta_2$ | 179.4  | -0.6                 |
| $\theta_3$ | 184.6  | +4.6                 |
| $\theta_4$ | 191.6  | +11.6                |
| $\theta_5$ | 184.3  | +4.3                 |

**Table S1.** Dihedral angles of core part of bound NS4A (PDB Code: 1NS3).

## S2. Spectra of Intermediates and Final Compounds

*5-(tert-butyl) 2-ethyl 1H-imidazole-2,5-dicarboxylate (2)*

This report was created by ACD/NMR Processor Academic Edition. For more information go to [www.acdlabs.com/nmrproc/](http://www.acdlabs.com/nmrproc/)

3/2/2017 1:46:23 PM

|                        |                                                                                                    |                        |                                                     |
|------------------------|----------------------------------------------------------------------------------------------------|------------------------|-----------------------------------------------------|
| Formula                | C <sub>11</sub> H <sub>10</sub> N <sub>2</sub> O <sub>4</sub>                                      | FW                     | 240.2557                                            |
| Acquisition Time (sec) | 2.6477                                                                                             | Comment                | CIX-1078756, KAU1501KTM-156_1, 1H, DMSO-d6 @ 211492 |
| Date Stamp             | 10 Sep 2015 20:25:04                                                                               | Date                   | 10 Sep 2015 20:25:04                                |
| File Name              | C:\Users\mtk0005\Google Drive\KAU\MEI-Arab\12-BIO3193-03 Imidazole Cpd\1H-NMR\KAU1501KTM-156_1\fid | Frequency (MHz)        | 300.13                                              |
| Nucleus                | 1H                                                                                                 | Number of Transients   | 8                                                   |
| Owner                  | Administrator                                                                                      | Points Count           | 16384                                               |
| SW (cyclical) (Hz)     | 6188.12                                                                                            | Pulse Sequence         | zg                                                  |
| Sweep Width (Hz)       | 6187.74                                                                                            | Solvent                | DMSO-d6                                             |
|                        |                                                                                                    | Spectrum Offset (Hz)   | 1853.6917                                           |
|                        |                                                                                                    | Receiver Gain          | 256.00                                              |
|                        |                                                                                                    | Temperature (degree C) | 26.160                                              |
|                        |                                                                                                    | Spectrum Type          | STANDARD                                            |

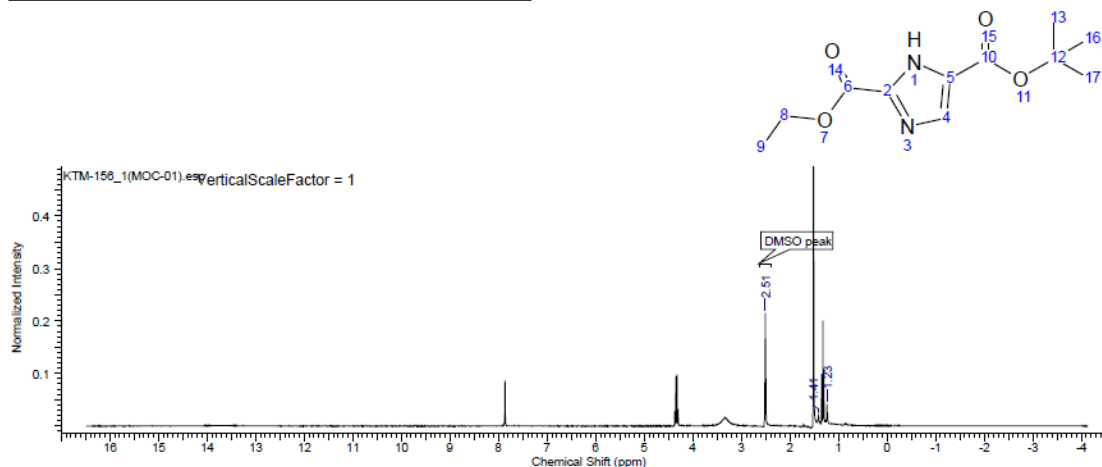

Peak ID Time Mass Found  
3 1.41 240.11  
3: (Time: 1.41) 1.7e+007

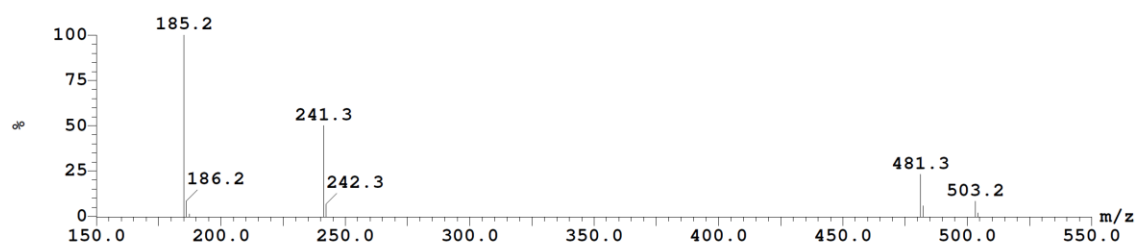

This report was created by ACD/NMR Processor Academic Edition. For more information go to [www.acdlabs.com/nmrproc/](http://www.acdlabs.com/nmrproc/)

3/2/2017 1:50:15 PM

|                        |                                                                                                      |                        |                                                     |                      |                      |
|------------------------|------------------------------------------------------------------------------------------------------|------------------------|-----------------------------------------------------|----------------------|----------------------|
| Acquisition Time (sec) | 5.3084                                                                                               | Comment                | CIX-1078848, KAU1501KTM-181 1, 1H, DMSO-d6 @ 211890 | Date                 | 14 Sep 2015 21:24:48 |
| Date Stamp             | 14 Sep 2015 21:24:48                                                                                 |                        |                                                     |                      |                      |
| File Name              | C:\Users\msh0005\Google Drive\KAU\MEI-Araby\112-BIO3193-03 Imidazole Cpd\1H-NMR\KAU1501KTM-181 1.fid | Frequency (MHz)        | 300.13                                              |                      |                      |
| Nucleus                | 1H                                                                                                   | Number of Transients   | 16                                                  | Origin               | spect                |
| Owner                  | quest                                                                                                | Points Count           | 32768                                               | Pulse Sequence       | zg30                 |
| SW (Hz)                | 6172.84                                                                                              | Solvent                | DMSO-d6                                             | Receiver Gain        | 645.10               |
| Sweep Width (Hz)       | 6172.85                                                                                              | Temperature (degree C) | 26.400                                              | Spectrum Offset (Hz) | 1853.4263            |
|                        |                                                                                                      |                        |                                                     | Spectrum Type        | STANDARD             |

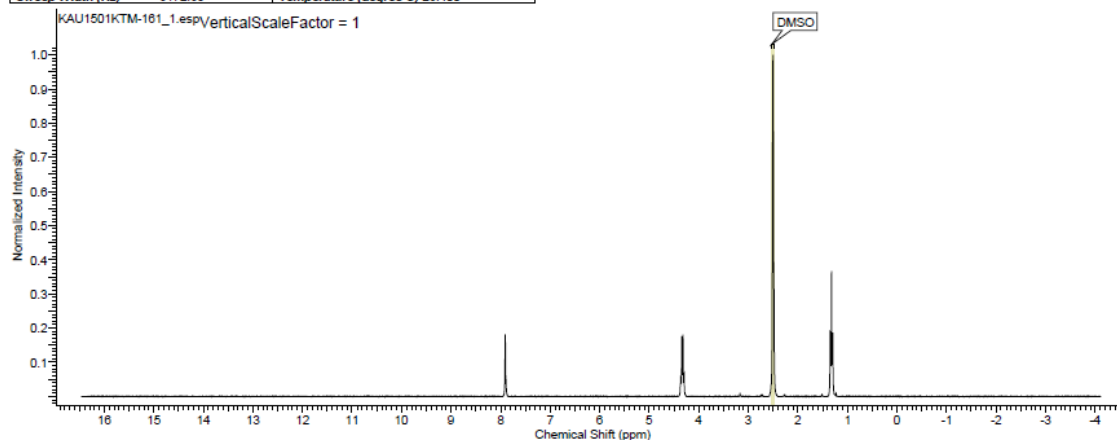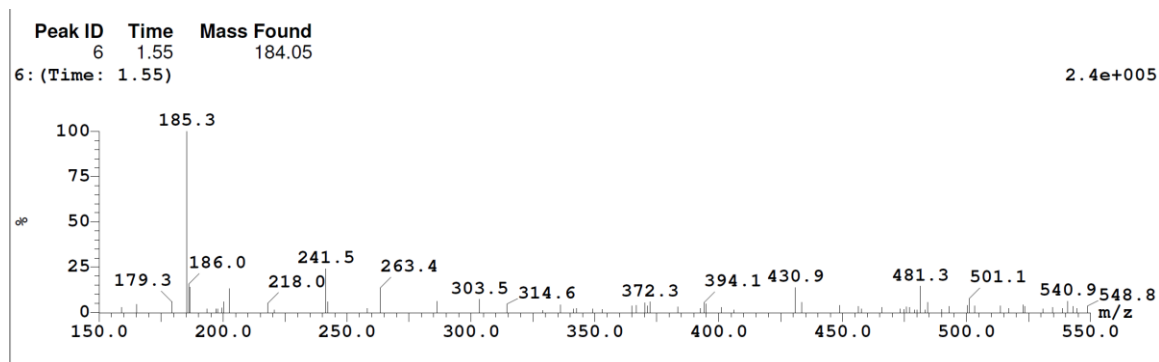

*Ethyl 4-((2-(methylamino)-2-oxoethyl)carbamoyl)-1H-imidazole-2-carboxylate (4a)*

This report was created by ACD/NMR Processor Academic Edition. For more information go to [www.acdlabs.com/nmrproc/](http://www.acdlabs.com/nmrproc/)

3/8/2017 3:58:45 PM

|                        |                                                                                                     |                        |                                                     |
|------------------------|-----------------------------------------------------------------------------------------------------|------------------------|-----------------------------------------------------|
| Formula                | C <sub>14</sub> H <sub>14</sub> N <sub>4</sub> O <sub>3</sub>                                       | FW                     | 254.2426                                            |
| Acquisition Time (sec) | 5.3084                                                                                              | Comment                | CIX-1078327, KAU1501KTM-190_1, 1H, DMSO-d6 @ 216449 |
| Date Stamp             | 13 Oct 2015 20:31:28                                                                                | Date                   | 13 Oct 2015 20:31:28                                |
| File Name              | C:\Users\mtk0005\Google Drive\KAU\MEI-Araby\12-BIO3193-03 Imidazole Cpd\1H-NMR\KAU1501KTM-190_1.fid | Frequency (MHz)        | 300.13                                              |
| Nucleus                | 1H                                                                                                  | Number of Transients   | 16                                                  |
| Owner                  | quest                                                                                               | Points Count           | 32768                                               |
| SW (cyclical) (Hz)     | 6172.84                                                                                             | Pulse Sequence         | zg30                                                |
| Sweep Width (Hz)       | 6172.65                                                                                             | Solvent                | DMSO-d6                                             |
|                        |                                                                                                     | Spectrum Offset (Hz)   | 1853.4263                                           |
|                        |                                                                                                     | Temperature (degree C) | 26.900                                              |
|                        |                                                                                                     | Receiver Gain          | 512.00                                              |
|                        |                                                                                                     | Spectrum Type          | STANDARD                                            |

<sup>1</sup>H NMR (300 MHz, DMSO-d<sub>6</sub>) δ 8.19 (br. s., 1H), 7.81 (s, 2H), 4.35 (q, *J* = 7.16 Hz, 2H), 3.81 (d, *J* = 5.65 Hz, 2H), 2.59 (d, *J* = 4.52 Hz, 3H), 1.33 (t, *J* = 7.16 Hz, 3H)

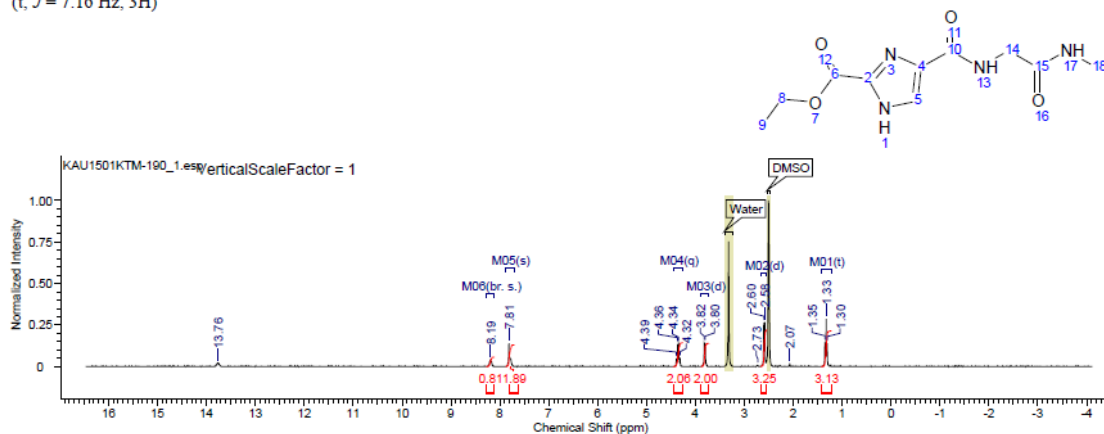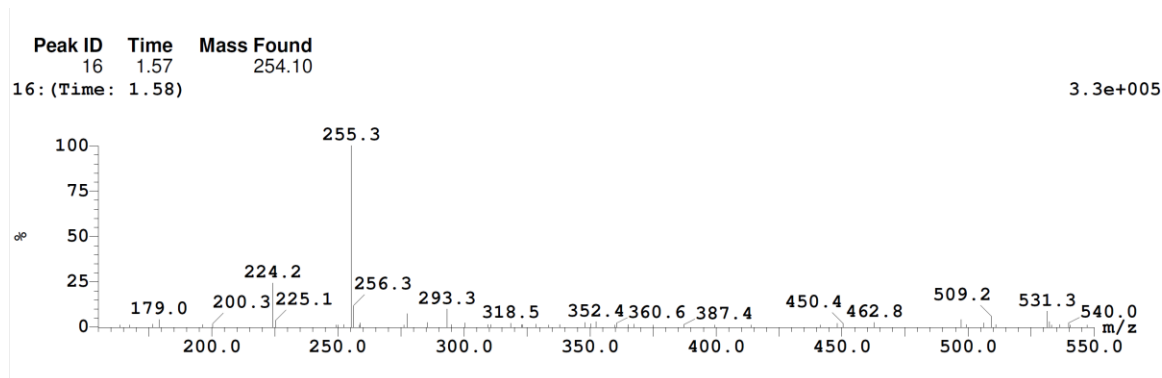

Ethyl 5-((pyridin-2-ylmethyl)carbamoyl)-1H-imidazole-2-carboxylate (4c)

This report was created by ACD/NMR Processor Academic Edition. For more information go to [www.acdlabs.com/nmrproc/](http://www.acdlabs.com/nmrproc/)

3/2/2017 2:00:53 PM

|                        |                                                                                                      |                        |                                                     |                      |           |                       |                      |
|------------------------|------------------------------------------------------------------------------------------------------|------------------------|-----------------------------------------------------|----------------------|-----------|-----------------------|----------------------|
| Acquisition Time (sec) | 5.3084                                                                                               | Comment                | CIX-1079258, KAU1501KTM-185_1, 1H, DMSO-d6 @ 215311 |                      |           | Date                  | 06 Oct 2015 20:50:40 |
| Date Stamp             | 06 Oct 2015 20:50:40                                                                                 |                        |                                                     |                      |           |                       |                      |
| File Name              | C:\Users\mtk0005\Google Drive\KAU\MEI-Araby\112-BIO3193-03 Imidazole Cpd\1H-NMR\KAU1501KTM-185_1.fid |                        |                                                     |                      |           | Frequency (MHz)       | 300.13               |
| Nucleus                | 1H                                                                                                   | Number of Transients   | 16                                                  | Origin               | spect     | Original Points Count | 32768                |
| Owner                  | quest                                                                                                | Points Count           | 32768                                               | Pulse Sequence       | zg30      | Receiver Gain         | 456.10               |
| SW(cyclical) (Hz)      | 6172.84                                                                                              | Solvent                | DMSO-d6                                             | Spectrum Offset (Hz) | 1853.4263 | Spectrum Type         | STANDARD             |
| Sweep Width (Hz)       | 6172.65                                                                                              | Temperature (degree C) | 25.500                                              |                      |           |                       |                      |

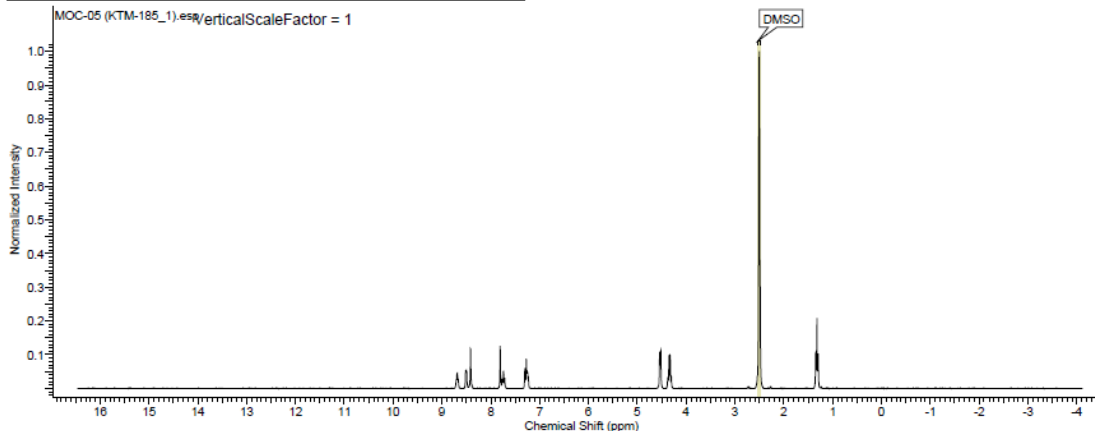

## MOC-11

This report was created by ACD/NMR Processor Academic Edition. For more information go to [www.acdlabs.com/nmrproc/](http://www.acdlabs.com/nmrproc/)

5/6/2017 10:03:53 AM

|                        |                                                                                                          |                        |                                                                  |                      |           |
|------------------------|----------------------------------------------------------------------------------------------------------|------------------------|------------------------------------------------------------------|----------------------|-----------|
| Acquisition Time (sec) | 2.6477                                                                                                   | Comment                | CIX-1082893, KAU1501KTM-228_1A, 1H, CD3OD - Methanol-D4 @ 225918 |                      |           |
| Date                   | 16 Nov 2015 23:17:36                                                                                     |                        | Date Stamp                                                       | 16 Nov 2015 23:17:36 |           |
| File Name              | C:\Users\Maankhayat\Google Drive\KAU\MEI-Araby\112-BIO3193-03 Imidazole Cpd\1H-NMR\KAU1501KTM-228_1A.fid |                        |                                                                  | Frequency (MHz)      | 300.13    |
| Nucleus                | 1H                                                                                                       | Number of Transients   | 8                                                                | Origin               | spect     |
| Owner                  | Administrator                                                                                            | Points Count           | 16384                                                            | Pulse Sequence       | zg        |
| SW(cyclical) (Hz)      | 6188.12                                                                                                  | Solvent                | METHANOL-d4                                                      | Spectrum Offset (Hz) | 1853.6917 |
| Sweep Width (Hz)       | 6187.74                                                                                                  | Temperature (degree C) | 25.160                                                           | Receiver Gain        | 645.10    |
|                        |                                                                                                          |                        |                                                                  | Spectrum Type        | STANDARD  |

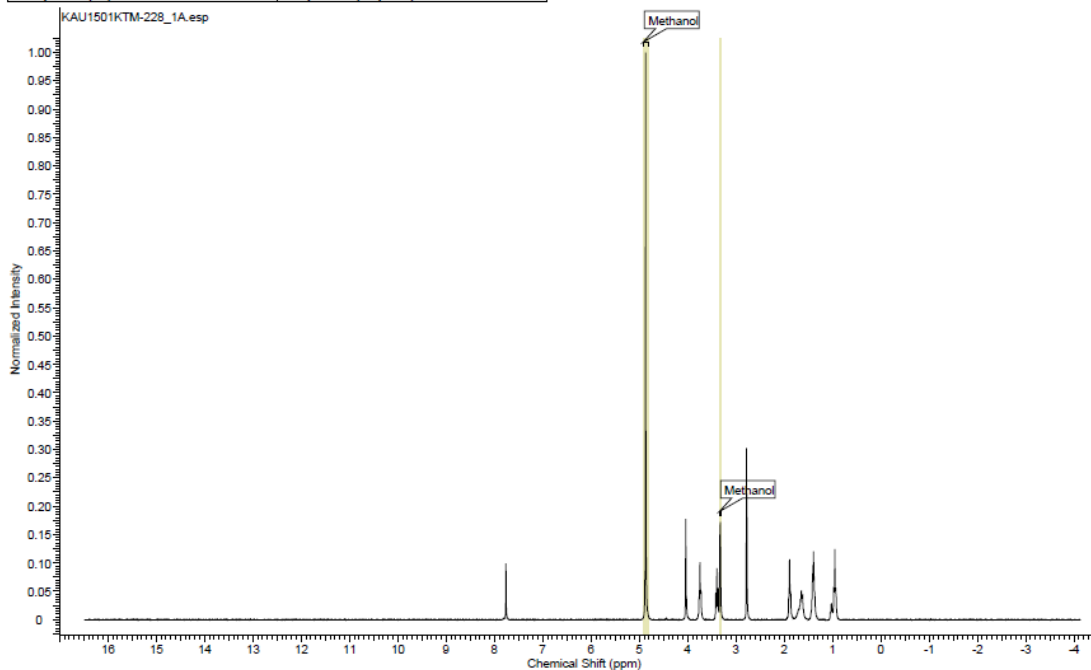

SpinWorks 4: C1x 1002695, K501501K1M 220 1H, 2016 01 05 15:46:55.0; 15C, CD3OD Methanol-D4 @ 250480

12.964 —  
22.078 —  
24.946 —  
28.852 —  
28.967 —  
38.918 —  
41.727 —  
46.781 —  
47.064 —  
47.349 —  
47.512 —  
47.512 —  
48.199 —  
48.484 —  
141.115 —  
158.598 —  
163.740 —  
170.795 —

PPM

freq. of 0 ppm: 75.467746 MHz  
processed size: 32768 complex points  
LB: 1.000 GF: 0.0000  
Hz/cm: 627.979 ppm/cm: 8.32028

8.3e+005

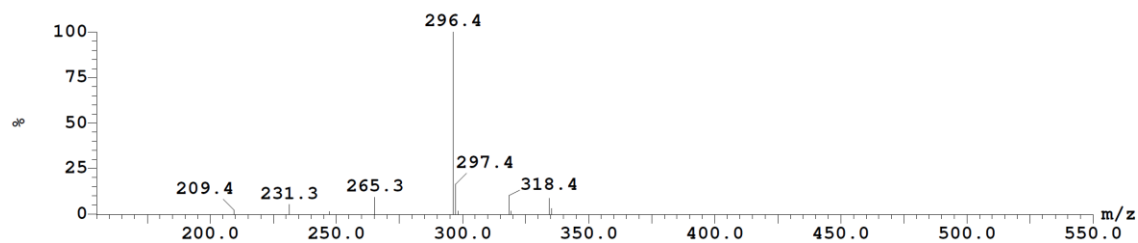

MOC-34

This report was created by ACD/NMR Processor Academic Edition. For more information go to [www.acdlabs.com/nmrproc/](http://www.acdlabs.com/nmrproc/)

5/8/2017 8:03:26 AM

|                        |                                                                                                      |                        |                                                                  |
|------------------------|------------------------------------------------------------------------------------------------------|------------------------|------------------------------------------------------------------|
| Formula                | C <sub>14</sub> H <sub>12</sub> N <sub>4</sub> O <sub>4</sub>                                        | FW                     | 330.3418                                                         |
| Acquisition Time (sec) | 2.6477                                                                                               | Comment                | CIX-1080569, KAU1501KTM-212_1A, 1H, CD3OD - Methanol-D4 @ 219296 |
| Date                   | 22 Oct 2015 11:42:24                                                                                 | Date Stamp             | 22 Oct 2015 11:42:24                                             |
| File Name              | C:\Users\mrk0009\Google Drive\KAUIMEI-Araby\12-BIO3193-03 Imidazole Cpd\1H-NMR\KAU1501KTM-212_1A.fid | Frequency (MHz)        | 300.13                                                           |
| Nucleus                | 1H                                                                                                   | Number of Transients   | 8                                                                |
| Owner                  | Administrator                                                                                        | Points Count           | 16384                                                            |
| SW (cyclical) (Hz)     | 6188.12                                                                                              | Pulse Sequence         | zg                                                               |
| Sweep Width (Hz)       | 6187.74                                                                                              | Solvent                | METHANOL-d4                                                      |
|                        |                                                                                                      | Spectrum Offset (Hz)   | 1853.8917                                                        |
|                        |                                                                                                      | Receiver Gain          | 812.70                                                           |
|                        |                                                                                                      | Spectrum Type          | STANDARD                                                         |
|                        |                                                                                                      | Temperature (degree C) | 25.160                                                           |

<sup>1</sup>H NMR (300 MHz, METHANOL-d<sub>4</sub>) δ 8.65 (d, *J* = 4.91 Hz, 1H), 8.08 - 8.32 (m, 1H), 7.69 - 7.93 (m, 2H), 7.54 - 7.69 (m, 1H), 3.47 (dd, *J* = 5.85, 19.83 Hz, 4H), 1.97 (s, 3H), 0.92 - 1.19 (m, 1H)

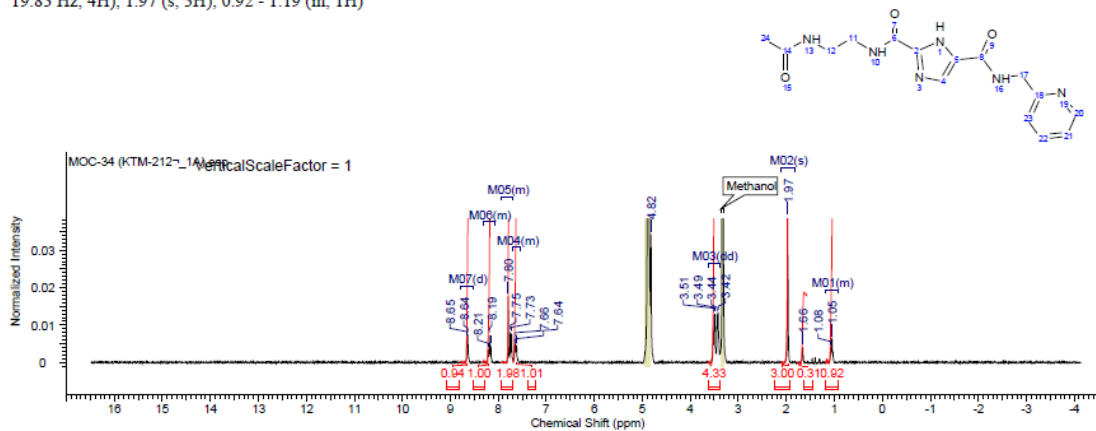

SpinWorks 4: CIX-1080569, KAU1501KTM-212\_1A, 2016-01-05 13:40:39.0, 13C, CD3OD - Methanol-D4 @ 236474

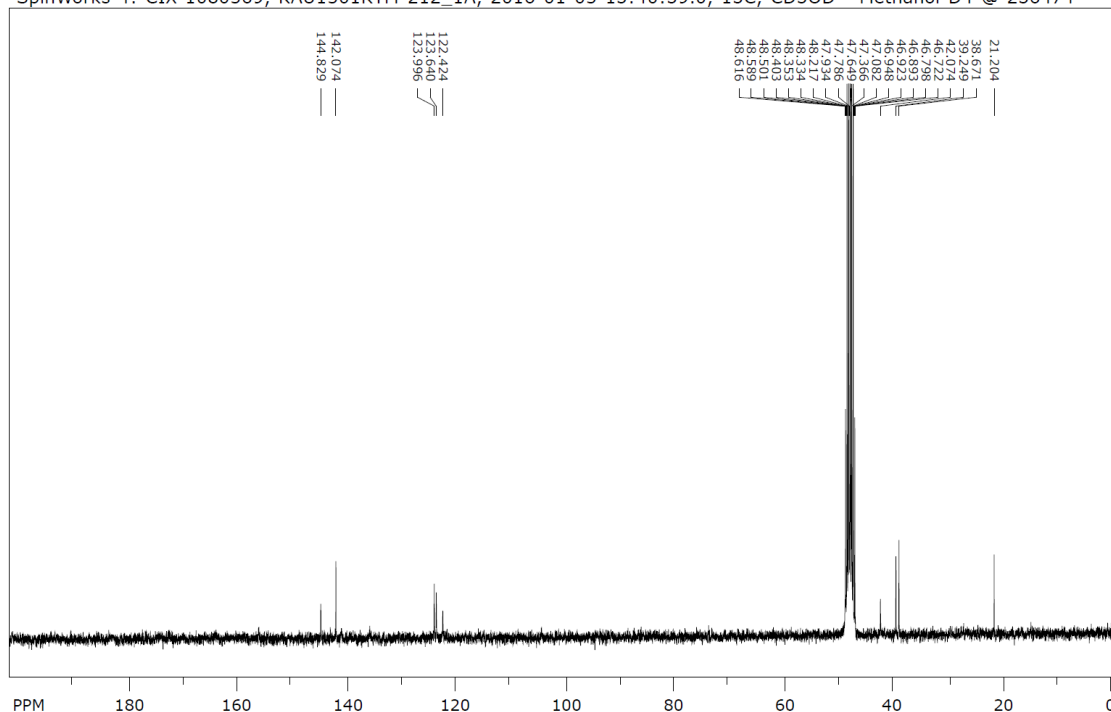

file: ...1KTM-212\_1A, 13C, 110 @ 236474.fid exp: <zgpg30>  
transmitter freq.: 75.475670 MHz  
time domain size: 65536 points  
width: 20325.20 Hz = 269.2948 ppm = 0.310138 Hz/pt  
number of scans: 640

freq. of 0 ppm: 75.467746 MHz  
processed size: 32768 complex points  
LB: 1.000 GF: 0.0000  
Hz/cm: 615.363 ppm/cm: 8.15313



Peak ID Time Mass Found  
8 3.18 330.14  
8: (Time: 3.16) 6.3e+005

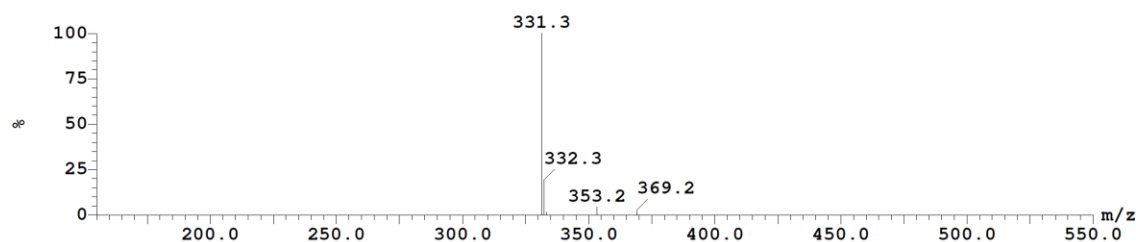

## MOC-23

This report was created by ACD/NMR Processor Academic Edition. For more information go to [www.acdlabs.com/nmrproc/](http://www.acdlabs.com/nmrproc/)

5/9/2017 1:06:20 PM

|                        |                                                                                                      |                        |                                                              |
|------------------------|------------------------------------------------------------------------------------------------------|------------------------|--------------------------------------------------------------|
| Acquisition Time (sec) | 5.3084                                                                                               | Comment                | CIX-1084257_KAU1501KTM-249_1_1H_CD3OD - Methanol-D4 @ 229355 |
| Date                   | 26 Nov 2015 20:52:32                                                                                 | Date Stamp             | 26 Nov 2015 20:52:32                                         |
| File Name              | C:\Users\mtk0005\Google Drive\KAU\MEI-Araby\12-BIO3193-03 Imidazole Cpds\1H-NMR\KAU1501KTM-249_1.fid | Frequency (MHz)        | 300.13                                                       |
| Nucleus                | 1H                                                                                                   | Number of Transients   | 16                                                           |
| Owner                  | guest                                                                                                | Points Count           | 32768                                                        |
| SW(cyclical) (Hz)      | 6172.84                                                                                              | Solvent                | METHANOL-d4                                                  |
| Sweep Width (Hz)       | 6172.65                                                                                              | Temperature (degree C) | 26.100                                                       |
|                        |                                                                                                      | Origin                 | spect                                                        |
|                        |                                                                                                      | Pulse Sequence         | zg30                                                         |
|                        |                                                                                                      | Spectrum Offset (Hz)   | 1853.4263                                                    |
|                        |                                                                                                      | Receiver Gain          | 912.30                                                       |
|                        |                                                                                                      | Spectrum Type          | STANDARD                                                     |

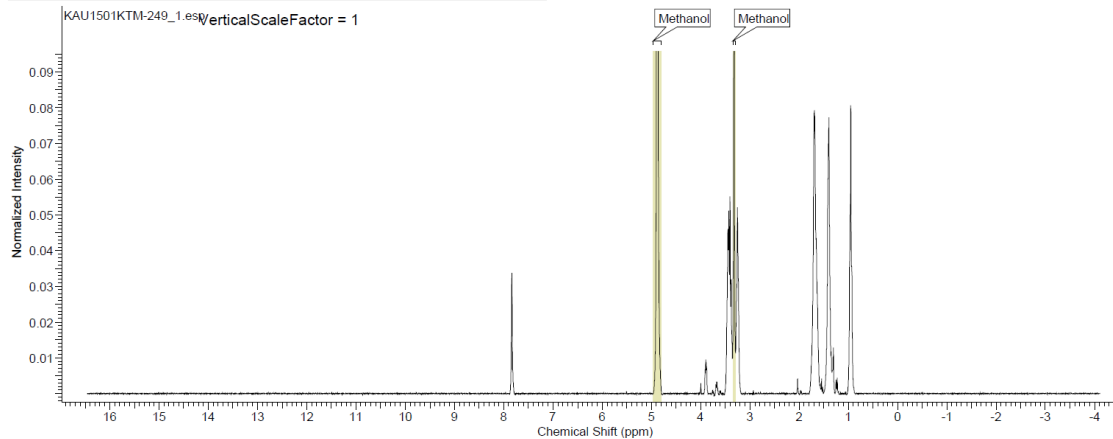

## MOC-24

This report was created by ACD/NMR Processor Academic Edition. For more information go to [www.acdlabs.com/nmrproc/](http://www.acdlabs.com/nmrproc/)

5/9/2017 1:02:51 PM

|                        |                                                                                                      |                        |                                                                                       |                      |           |
|------------------------|------------------------------------------------------------------------------------------------------|------------------------|---------------------------------------------------------------------------------------|----------------------|-----------|
| Acquisition Time (sec) | 5.3084                                                                                               | Comment                | CIX-1084297_KAU1501KTM-250_1, 2015-12-10 15:21:28.0, 1H, CD3OD - Methanol-D4 @ 234378 |                      |           |
| Date                   | 10 Dec 2015 20:50:24                                                                                 | Date Stamp             | 10 Dec 2015 20:50:24                                                                  |                      |           |
| File Name              | C:\Users\imtk0005\Google Drive\KAU\MEI-Araby\12-BIO3193-03 Imidazole Cpd\1H-NMR\KAU1501KTM-250_1.fid |                        |                                                                                       | Frequency (MHz)      | 300.13    |
| Nucleus                | 1H                                                                                                   | Number of Transients   | 16                                                                                    | Origin               | spect     |
| Owner                  | guest                                                                                                | Points Count           | 32768                                                                                 | Pulse Sequence       | zg30      |
| SW(cyclical) (Hz)      | 6172.84                                                                                              | Solvent                | METHANOL-d4                                                                           | Spectrum Offset (Hz) | 1853.4263 |
| Sweep Width (Hz)       | 6172.65                                                                                              | Temperature (degree C) | 26.900                                                                                | Spectrum Type        | STANDARD  |

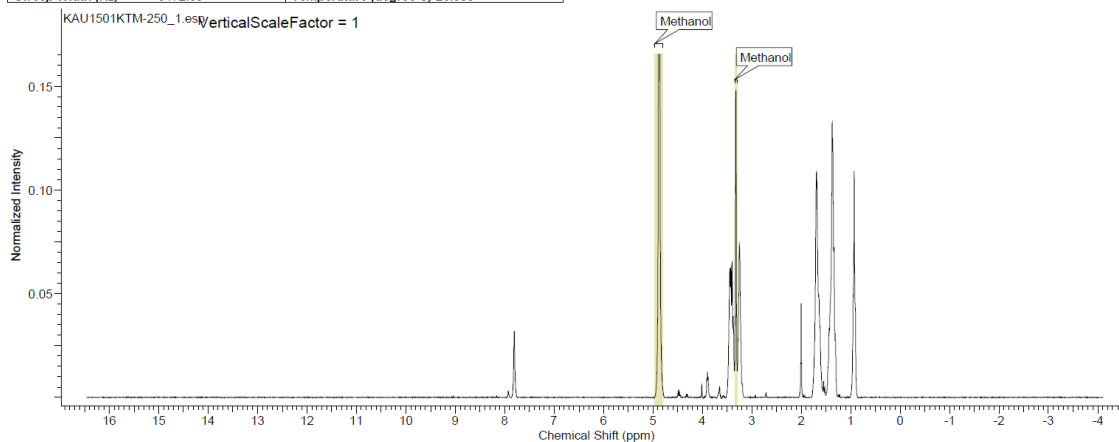

SpinWorks 4: CIX-1084297, KAU1501KTM-250\_1, 2016-01-05 13:40:39.0, 13C, CD3OD - Methanol-D4 @ 236488

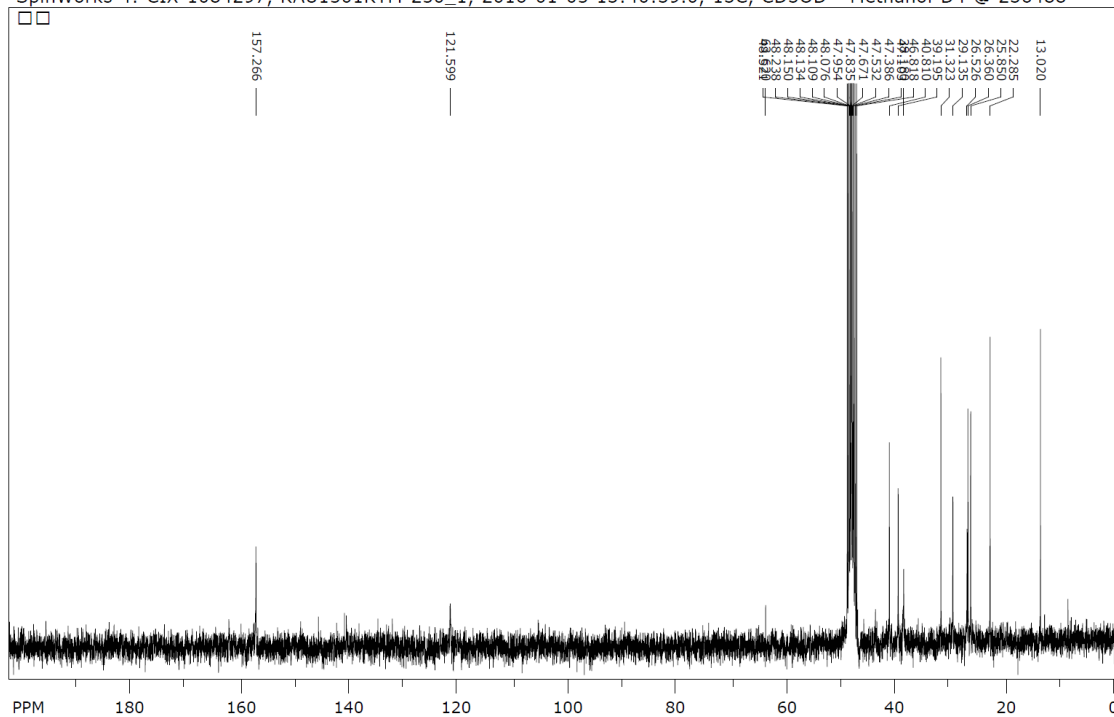

file: ...01KTM-250\_1, 13C, 240 @ 236488\fid expt: <zpgg30>  
transmitter freq.: 75.475670 MHz  
time domain size: 65536 points  
width: 20325.20 Hz = 269.2948 ppm = 0.310138 Hz/pt  
number of scans: 640

freq. of 0 ppm: 75.467746 MHz  
processed size: 32768 complex points  
LB: 1.000 GF: 0.0000  
Hz/cm: 618.225 ppm/cm: 8.19105

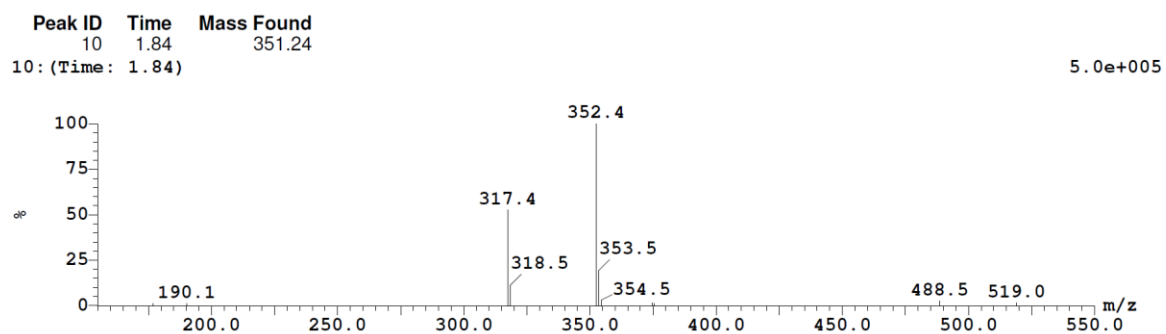

## MOC-26

This report was created by ACD/NMR Processor Academic Edition. For more information go to [www.acdlabs.com/nmrproc/](http://www.acdlabs.com/nmrproc/)

5/9/2017 12:55:16 PM

|                        |                                                                                                     |                        |                                                                                    |                       |           |
|------------------------|-----------------------------------------------------------------------------------------------------|------------------------|------------------------------------------------------------------------------------|-----------------------|-----------|
| Acquisition Time (sec) | 5.3084                                                                                              | Comment                | CIX-1084300_KAU1501KTM-253_1_2015-12-10 15:21:28.0_1H_CD3OD - Methanol-D4 @ 234380 |                       |           |
| Date                   | 10 Dec 2015 21:01:04                                                                                | Date Stamp             | 10 Dec 2015 21:01:04                                                               |                       |           |
| File Name              | C:\Users\mtk0005\Google Drive\KAU\MEI-Araby\12-BIO3193-03 Imidazole Cpd\1H-NMR\KAU1501KTM-253_1.fid |                        |                                                                                    |                       |           |
| Nucleus                | 1H                                                                                                  | Number of Transients   | 16                                                                                 | Origin                | spect     |
| Owner                  | guest                                                                                               | Points Count           | 32768                                                                              | Pulse Sequence        | zg30      |
| SW(cyclical) (Hz)      | 6172.84                                                                                             | Solvent                | METHANOL-d4                                                                        | Spectrum Offset (Hz)  | 1853.4263 |
| Sweep Width (Hz)       | 6172.65                                                                                             | Temperature (degree C) | 27.000                                                                             | Frequency (MHz)       | 300.13    |
|                        |                                                                                                     |                        |                                                                                    | Original Points Count | 32768     |
|                        |                                                                                                     |                        |                                                                                    | Receiver Gain         | 912.30    |
|                        |                                                                                                     |                        |                                                                                    | Spectrum Type         | STANDARD  |

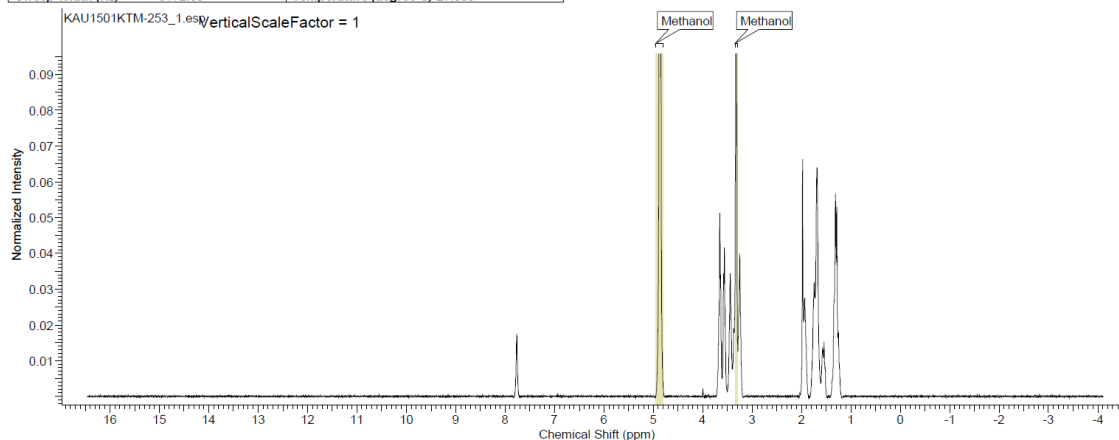

## MOC-27

This report was created by ACD/NMR Processor Academic Edition. For more information go to [www.acdlabs.com/nmrproc/](http://www.acdlabs.com/nmrproc/)

5/9/2017 12:48:13 PM

|                        |  |                                                                                                     |  |                        |  |             |            |                      |                                                              |           |  |                 |  |          |  |
|------------------------|--|-----------------------------------------------------------------------------------------------------|--|------------------------|--|-------------|------------|----------------------|--------------------------------------------------------------|-----------|--|-----------------|--|----------|--|
| Acquisition Time (sec) |  | 5.3084                                                                                              |  |                        |  |             | Comment    |                      | CIX-1086662_KAU1501KTM-254_1_1H_CD3OD - Methanol-D4 @ 231795 |           |  |                 |  |          |  |
| Date                   |  | 03 Dec 2015 21:26:40                                                                                |  |                        |  |             | Date Stamp |                      | 03 Dec 2015 21:26:40                                         |           |  |                 |  |          |  |
| File Name              |  | C:\Users\mtk0005\Google Drive\KAU\MEI-Araby\12-BIO3193-03 Imidazole Cpd\1H-NMR\KAU1501KTM-254_1.fid |  |                        |  |             |            |                      |                                                              |           |  |                 |  |          |  |
| Nucleus                |  | 1H                                                                                                  |  | Number of Transients   |  | 16          |            | Origin               |                                                              | spect     |  | Frequency (MHz) |  | 300.13   |  |
| Owner                  |  | guest                                                                                               |  | Points Count           |  | 32768       |            | Pulse Sequence       |                                                              | zg30      |  | Receiver Gain   |  | 724.10   |  |
| SW(cyclical) (Hz)      |  | 6172.84                                                                                             |  | Solvent                |  | METHANOL-d4 |            | Spectrum Offset (Hz) |                                                              | 1853.4263 |  | Spectrum Type   |  | STANDARD |  |
| Sweep Width (Hz)       |  | 6172.65                                                                                             |  | Temperature (degree C) |  | 26.800      |            |                      |                                                              |           |  |                 |  |          |  |

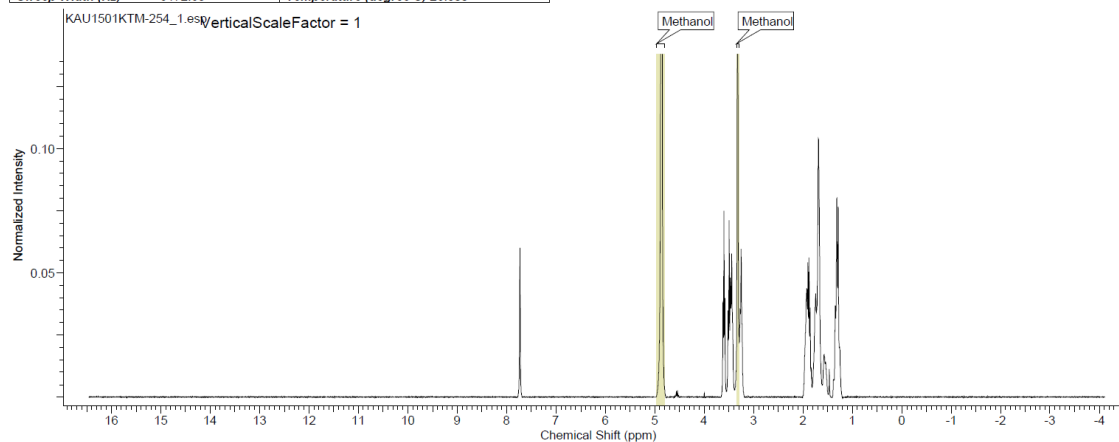

SpinWorks 4: CIX-1086662, KAU1501KTM-254\_1, 2016-01-05 13:40:39.0, <sup>13</sup>C, CD3OD - Methanol-D4 @ 236491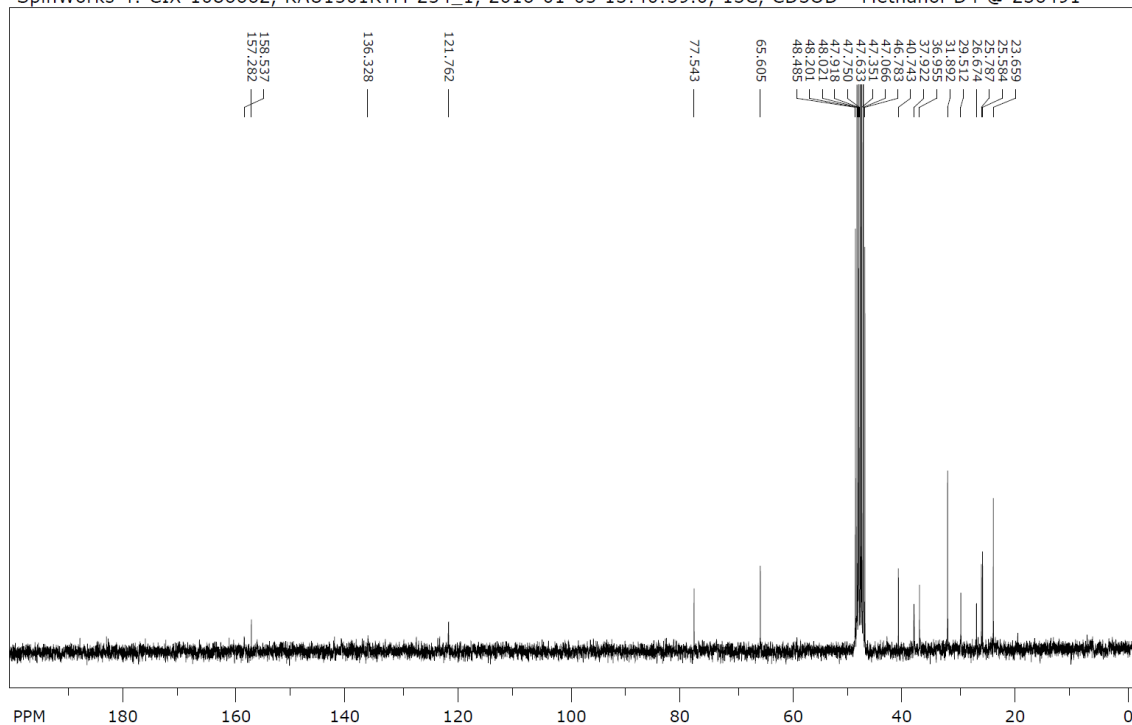

file: ...01KTM-254\_1, <sup>13</sup>C, 270 @ 236491\fid expt: <zpgp30>  
transmitter freq.: 75.475670 MHz  
time domain size: 65536 points  
width: 20325.20 Hz = 269.2948 ppm = 0.310138 Hz/pt  
number of scans: 640

freq. of 0 ppm: 75.467746 MHz  
processed size: 32768 complex points  
LB: 1.000 GF: 0.0000  
Hz/cm: 613.285 ppm/cm: 8.12560

| Peak ID | Time | Mass Found |
|---------|------|------------|
| 14      | 2.01 | 407.26     |

14: (Time: 2.01)

7.8e+005

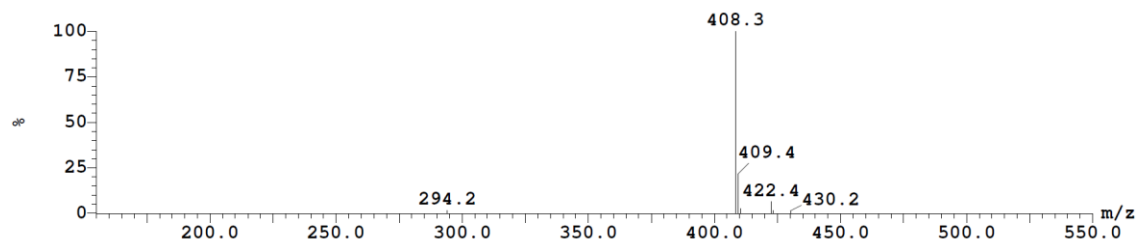

## MOC-28

This report was created by ACD/NMR Processor Academic Edition. For more information go to [www.acdlabs.com/nmrproc/](http://www.acdlabs.com/nmrproc/)

5/9/2017 1:10:35 PM

|                        |                                                                                                      |                      |                                                                                        |                      |
|------------------------|------------------------------------------------------------------------------------------------------|----------------------|----------------------------------------------------------------------------------------|----------------------|
| Acquisition Time (sec) | 5.3084                                                                                               | Comment              | CIX-1084301, KAU1501KTM-311_1, 2015-12-21 15:41:06.0, 1H, CD3OD - Methanol-D4 @ 236170 |                      |
| Date                   | 21 Dec 2015 22:39:12                                                                                 | Date Stamp           | 21 Dec 2015 22:39:12                                                                   |                      |
| File Name              | C:\Users\imtk0005\Google Drive\KAU\MEI-Araby\12-BIO3193-03 Imidazole Cpd\1H-NMR\KAU1501KTM-311_1.fid |                      |                                                                                        | Frequency (MHz)      |
| Nucleus                | 1H                                                                                                   | Number of Transients | 16                                                                                     | Origin               |
| Owner                  | guest                                                                                                | Points Count         | 32768                                                                                  | Pulse Sequence       |
| SW(cyclical) (Hz)      | 6172.84                                                                                              | Solvent              | METHANOL-d4                                                                            | Spectrum Offset (Hz) |
| Sweep Width (Hz)       | 6172.65                                                                                              |                      |                                                                                        | Spectrum Type        |

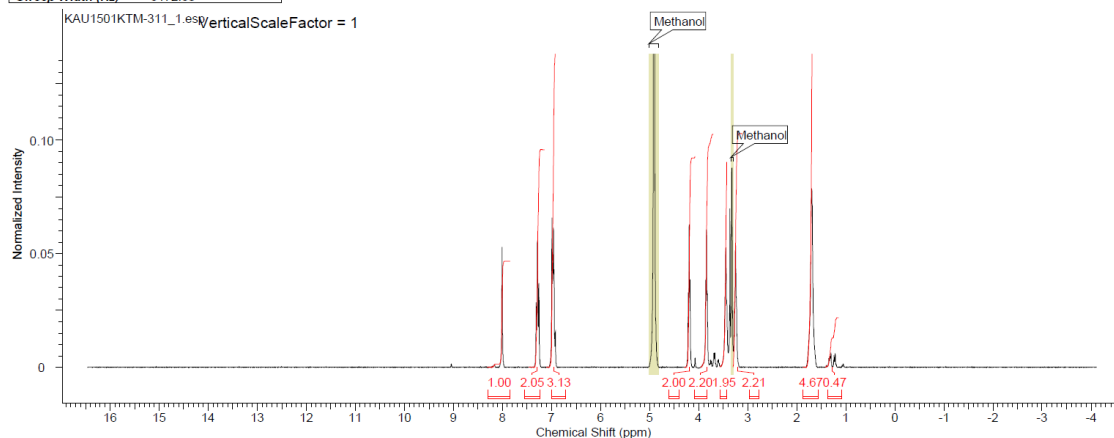

SpinWorks 4: CIX-1084301, KAU1501KTM-311\_1, 2015-12-21 15:41:06.0, 13C, CD3OD - Methanol-D4 @ 236170

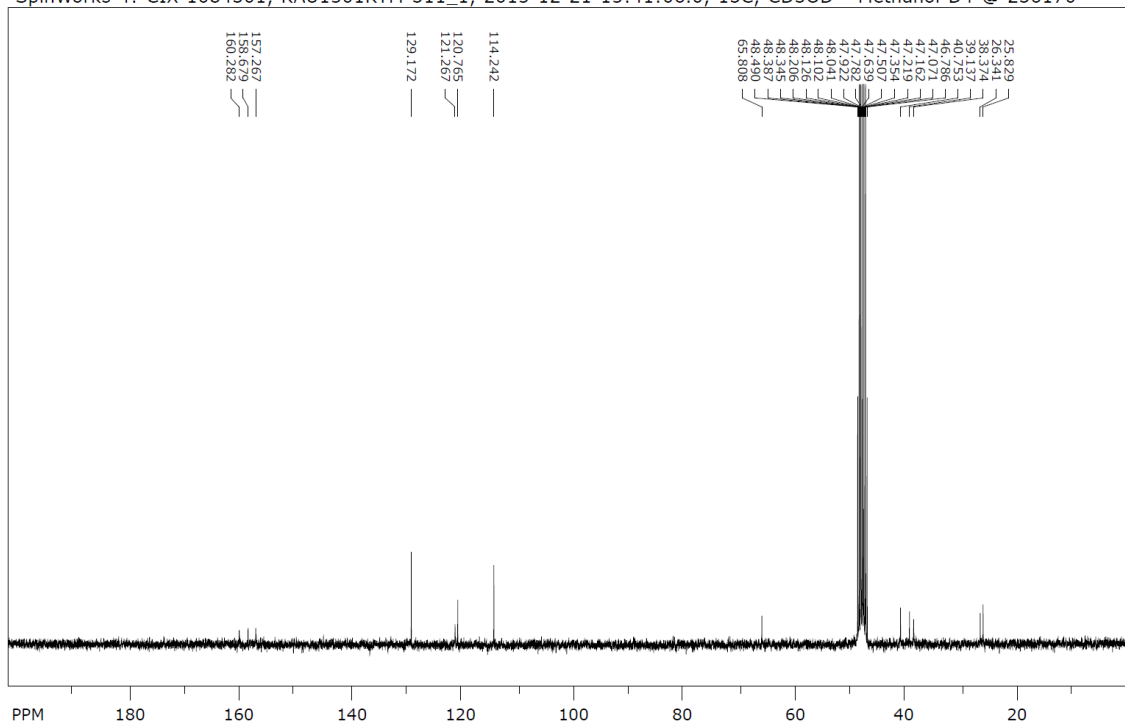

file: ...KTM-311\_1, 13C, 28931 @ 236170.fid expt: <zpgp30>  
transmitter freq.: 75.475670 MHz  
time domain size: 65536 points  
width: 20325.20 Hz = 269.2948 ppm = 0.310138 Hz/pt  
number of scans: 600

freq. of 0 ppm: 75.467746 MHz  
processed size: 32768 complex points  
LB: 1.000 GF: 0.0000  
Hz/cm: 614.662 ppm/cm: 8.14385

Peak ID Time Mass Found  
3 1.86 387.20  
3: (Time: 1.85)

8.6e+005

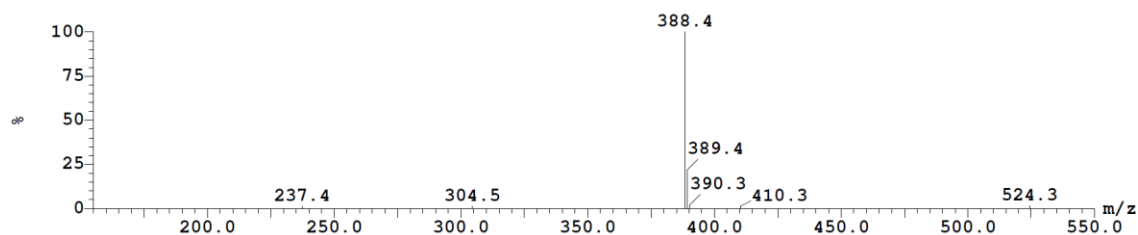

## MOC-29

This report was created by ACD/NMR Processor Academic Edition. For more information go to [www.acdlabs.com/nmrproc/](http://www.acdlabs.com/nmrproc/)

5/9/2017 9:06:02 AM

|                        |                                                                                                     |                        |                                                                |                      |           |
|------------------------|-----------------------------------------------------------------------------------------------------|------------------------|----------------------------------------------------------------|----------------------|-----------|
| Acquisition Time (sec) | 5.3084                                                                                              | Comment                | CIX-1086663, KAU1501KTM-255_1_1H, CD3OD - Methanol-D4 @ 231796 |                      |           |
| Date                   | 03 Dec 2015 22:07:12                                                                                | Date Stamp             | 03 Dec 2015 22:07:12                                           |                      |           |
| File Name              | C:\Users\mtk0005\Google Drive\KAU\MEI-Araby\12-BIO3193-03 Imidazole Cpd\1H-NMR\KAU1501KTM-255_1.fid |                        | Frequency (MHz)                                                | 300.13               |           |
| Nucleus                | 1H                                                                                                  | Number of Transients   | 16                                                             | Origin               | spect     |
| Owner                  | quest                                                                                               | Points Count           | 32768                                                          | Pulse Sequence       | zg30      |
| SW(cyclical) (Hz)      | 6172.84                                                                                             | Solvent                | METHANOL-d4                                                    | Receiver Gain        | 812.70    |
| Sweep Width (Hz)       | 6172.65                                                                                             | Temperature (degree C) | 26.600                                                         | Spectrum Offset (Hz) | 1853.4263 |
|                        |                                                                                                     |                        |                                                                | Spectrum Type        | STANDARD  |

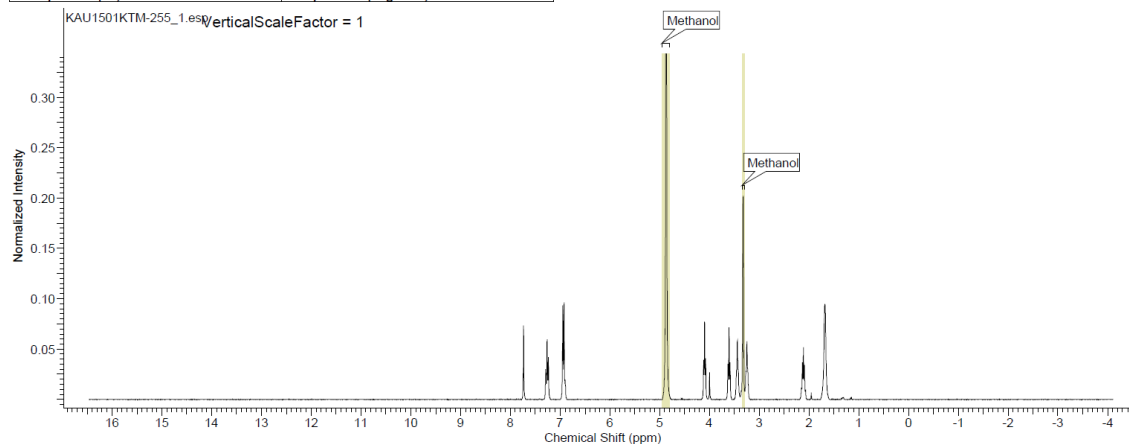

SpinWorks 4: CIX-1086663, KAU1501KTM-255\_1, 2016-01-05 13:40:39.0, <sup>13</sup>C, CD3OD - Methanol-D4 @ 236492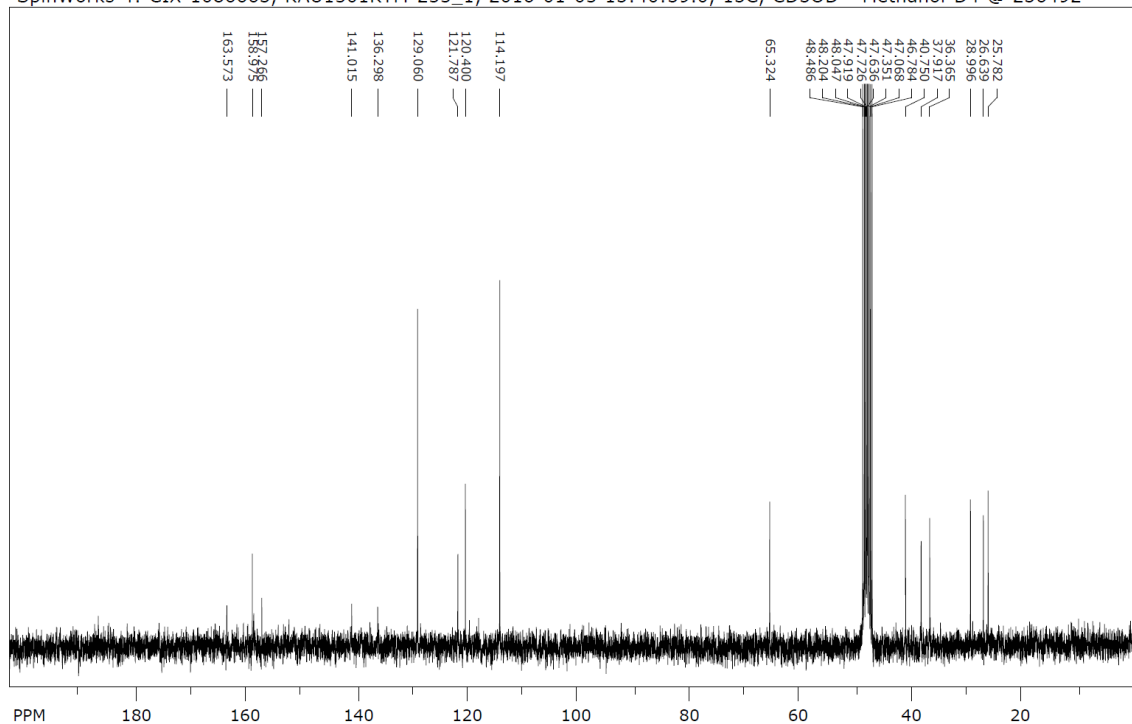

file: ...01KTM-255\_1, <sup>13</sup>C, 280 @ 236492.fid exp: <zpgp30>  
transmitter freq.: 75.475670 MHz  
time domain size: 65536 points  
width: 20325.20 Hz = 269.2948 ppm = 0.310138 Hz/pt  
number of scans: 640

freq. of 0 ppm: 75.467746 MHz  
processed size: 32768 complex points  
LB: 1.000 GF: 0.0000  
Hz/cm: 616.813 ppm/cm: 8.17235

| Peak ID | Time | Mass Found |
|---------|------|------------|
| 12      | 1.89 | 401.22     |

12: (Time: 1.89)

7.5e+005

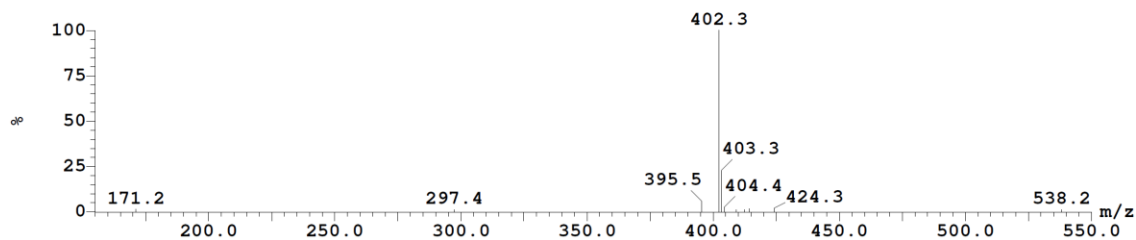

| Peak ID | Time | Mass Found |
|---------|------|------------|
| 18      | 2.87 | 352.20     |

18: (Time: 2.87)

7.6e+005

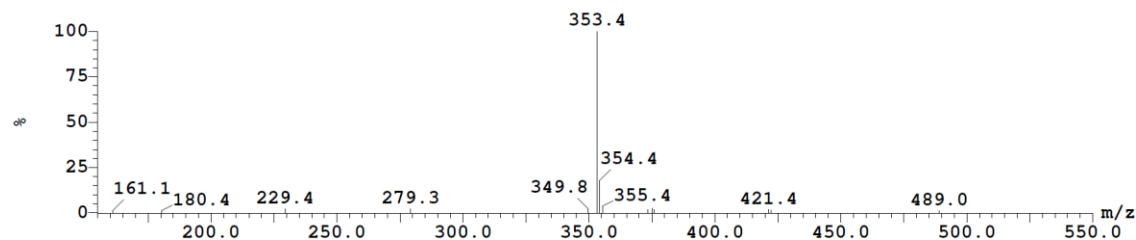



## MOC-30

This report was created by ACD/NMR Processor Academic Edition. For more information go to [www.acdlabs.com/nmrproc/](http://www.acdlabs.com/nmrproc/)

5/9/2017 8:57:15 AM

|                        |                                                                                                      |                        |                                                                 |                      |           |
|------------------------|------------------------------------------------------------------------------------------------------|------------------------|-----------------------------------------------------------------|----------------------|-----------|
| Acquisition Time (sec) | 5.3084                                                                                               | Comment                | CIX-1086665, KAU1501KTM-257_1, 1H, CD3OD - Methanol-D4 @ 231798 |                      |           |
| Date                   | 03 Dec 2015 21:37:20                                                                                 | Date Stamp             | 03 Dec 2015 21:37:20                                            |                      |           |
| File Name              | C:\Users\mtk0005\Google Drive\KAU\MEI-Araby\12-BIO3193-03 Imidazole Cpds\1H-NMR\KAU1501KTM-257_1.fid | Frequency (MHz)        | 300.13                                                          |                      |           |
| Nucleus                | 1H                                                                                                   | Number of Transients   | 16                                                              | Origin               | spect     |
| Owner                  | guest                                                                                                | Points Count           | 32768                                                           | Pulse Sequence       | zg30      |
| SW(cyclical) (Hz)      | 6172.84                                                                                              | Solvent                | METHANOL-d4                                                     | Spectrum Offset (Hz) | 1853.4263 |
| Sweep Width (Hz)       | 6172.65                                                                                              | Temperature (degree C) | 26.600                                                          | Spectrum Type        | STANDARD  |

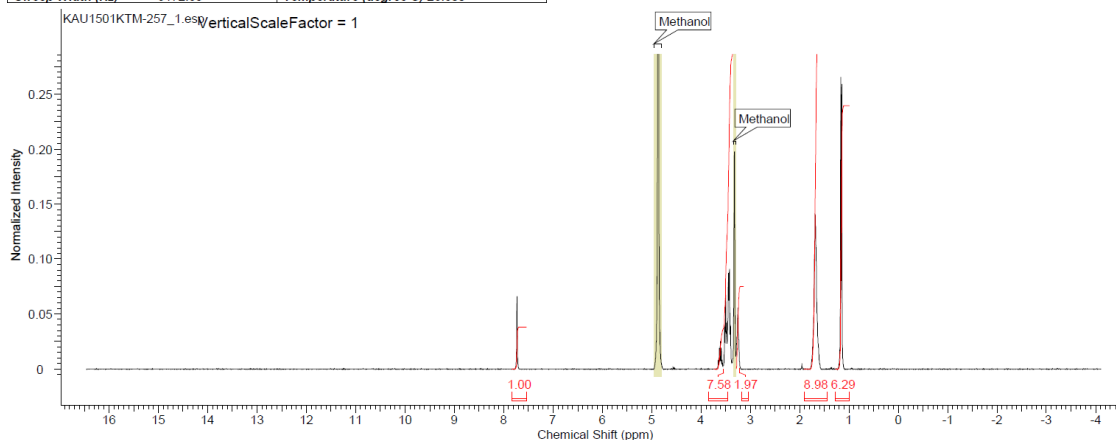

SpinWorks 4: CIX-1086665, KAU1501KTM-257\_1, 2016-01-05 13:40:39.0, 13C, CD3OD - Methanol-D4 @ 236494

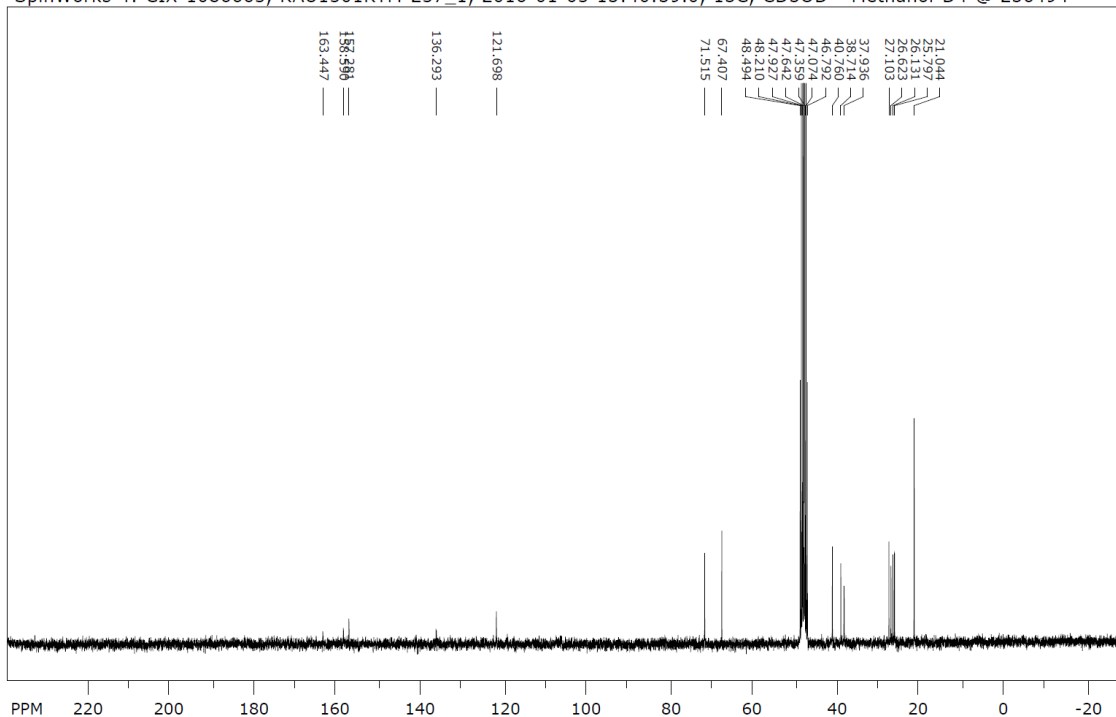

file: ...01KTM-257\_1, 13C, 300 @ 236494\fid exp: <zpgp30>  
transmitter freq.: 75.475670 MHz  
time domain size: 65536 points  
width: 20325.20 Hz = 269.2948 ppm = 0.310138 Hz/pt  
number of scans: 640

freq. of 0 ppm: 75.467746 MHz  
processed size: 32768 complex points  
LB: 1.000 GF: 0.0000  
Hz/cm: 813.008 ppm/cm: 10.77179

Peak ID Time Mass Found  
15 2.08 381.25  
15: (Time: 2.06)

1.4e+006

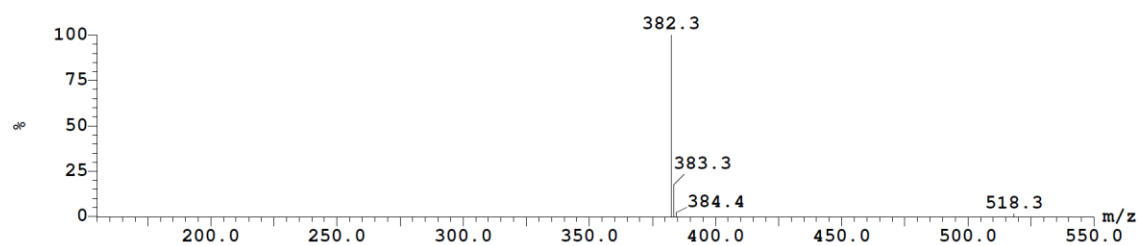

## MOC-31

This report was created by ACD/NMR Processor Academic Edition. For more information go to [www.acdlabs.com/nmrproc/](http://www.acdlabs.com/nmrproc/)

5/9/2017 8:44:35 AM

|                        |                                                                                                     |                      |                                                                 |
|------------------------|-----------------------------------------------------------------------------------------------------|----------------------|-----------------------------------------------------------------|
| Acquisition Time (sec) | 5.3084                                                                                              | Comment              | CIX-1086666, KAU1501KTM-258_1, 1H, CD3OD - Methanol-D4 @ 231799 |
| Date                   | 03 Dec 2015 21:43:44                                                                                | Date Stamp           | 03 Dec 2015 21:43:44                                            |
| File Name              | C:\Users\mtk0005\Google Drive\KAU\MEI-Araby\12-BIO3193-03 Imidazole Cpd\1H-NMR\KAU1501KTM-258_1.fid | Frequency (MHz)      | 300.13                                                          |
| Nucleus                | 1H                                                                                                  | Number of Transients | 16                                                              |
| Owner                  | guest                                                                                               | Points Count         | 32768                                                           |
| SW(cyclical) (Hz)      | 6172.84                                                                                             | Pulse Sequence       | zg30                                                            |
| Sweep Width (Hz)       | 6172.65                                                                                             | Solvent              | METHANOL-d4                                                     |
|                        |                                                                                                     | Spectrum Offset (Hz) | 1853.4263                                                       |
|                        |                                                                                                     | Receiver Gain        | 724.10                                                          |
|                        |                                                                                                     | Spectrum Type        | STANDARD                                                        |

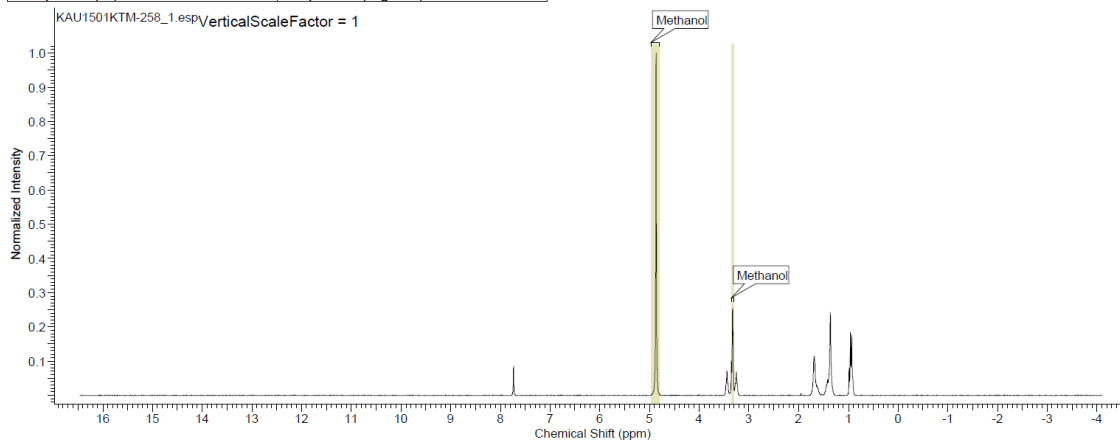

## SpinWorks 4:

CIX-1086666, KAU1501KTM-258\_1, 2016-01-05 13:40:39.0, 13C, CD3OD - Methanol-D4 @ 236495

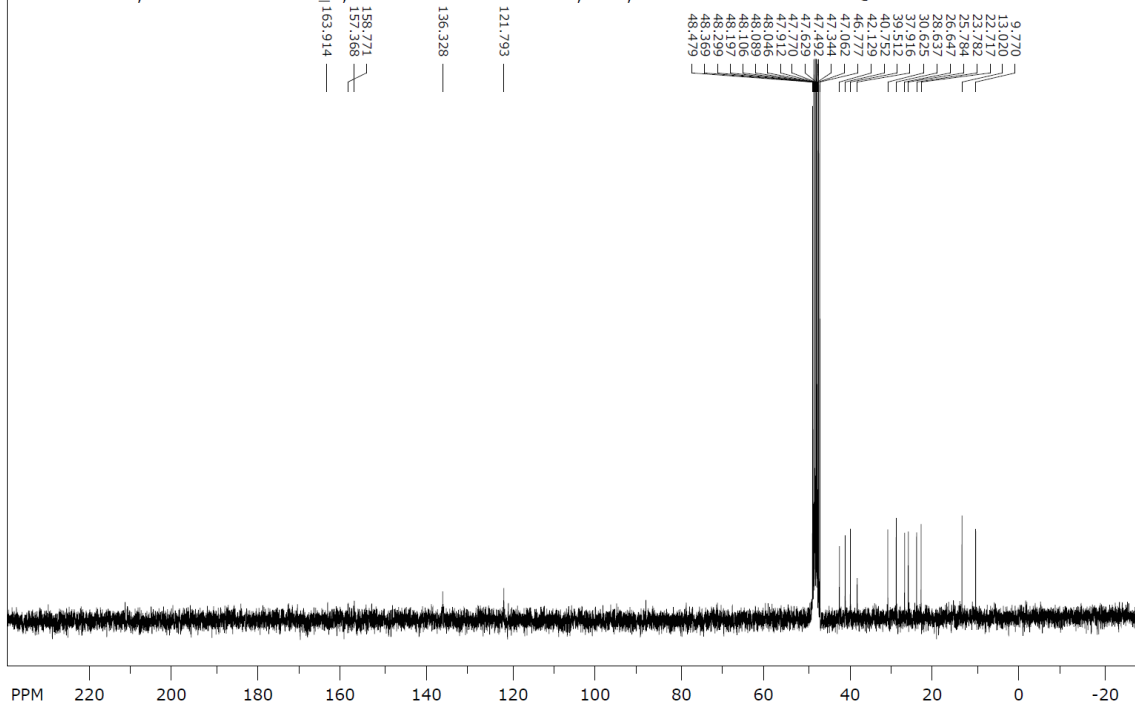

file: ...01KTM-258\_1, 13C, 310 @ 236495.fid exp: <zgpg30>  
transmitter freq.: 75.475670 MHz  
time domain size: 65536 points  
width: 20325.20 Hz = 269.2948 ppm = 0.310138 Hz/pt  
number of scans: 640

freq. of 0 ppm: 75.467746 MHz  
processed size: 32768 complex points  
LB: 1.000 GF: 0.0000  
Hz/cm: 813.008 ppm/cm: 10.77179

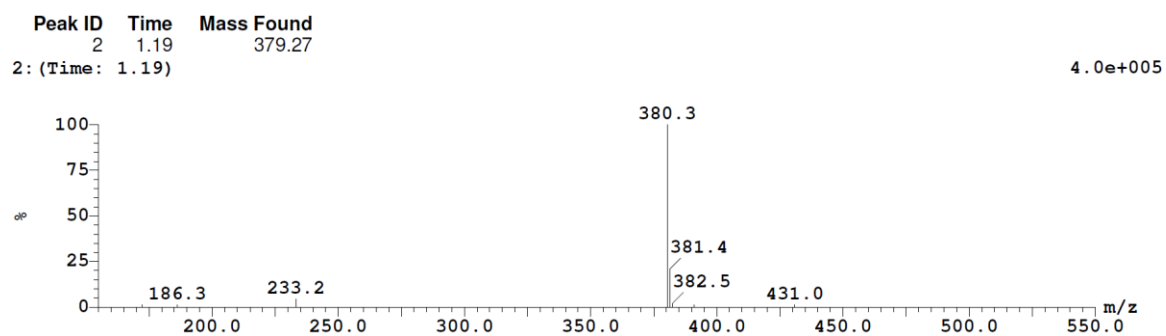

## MOC-32

This report was created by ACD/NMR Processor Academic Edition. For more information go to [www.acdlabs.com/nmrproc/](http://www.acdlabs.com/nmrproc/)

5/9/2017 8:40:15 AM

|                        |                                                                                                      |                        |                                                                 |                      |           |
|------------------------|------------------------------------------------------------------------------------------------------|------------------------|-----------------------------------------------------------------|----------------------|-----------|
| Acquisition Time (sec) | 5.3084                                                                                               | Comment                | CIX-1086668, KAU1501KTM-260_1, 1H, CD3OD - Methanol-D4 @ 231805 |                      |           |
| Date                   | 03 Dec 2015 21:54:24                                                                                 | Date Stamp             | 03 Dec 2015 21:54:24                                            |                      |           |
| File Name              | C:\Users\mtk0005\Google Drive\KAU\MEI-Araby\12-BIO3193-03 Imidazole Cpds\1H-NMR\KAU1501KTM-260_1.fid | Frequency (MHz)        | 300.13                                                          |                      |           |
| Nucleus                | 1H                                                                                                   | Number of Transients   | 16                                                              | Origin               | spect     |
| Owner                  | guest                                                                                                | Points Count           | 32768                                                           | Pulse Sequence       | zg30      |
| SW(cyclical) (Hz)      | 6172.84                                                                                              | Solvent                | METHANOL-d4                                                     | Spectrum Offset (Hz) | 1853.4263 |
| Sweep Width (Hz)       | 6172.65                                                                                              | Temperature (degree C) | 26.600                                                          | Spectrum Type        | STANDARD  |

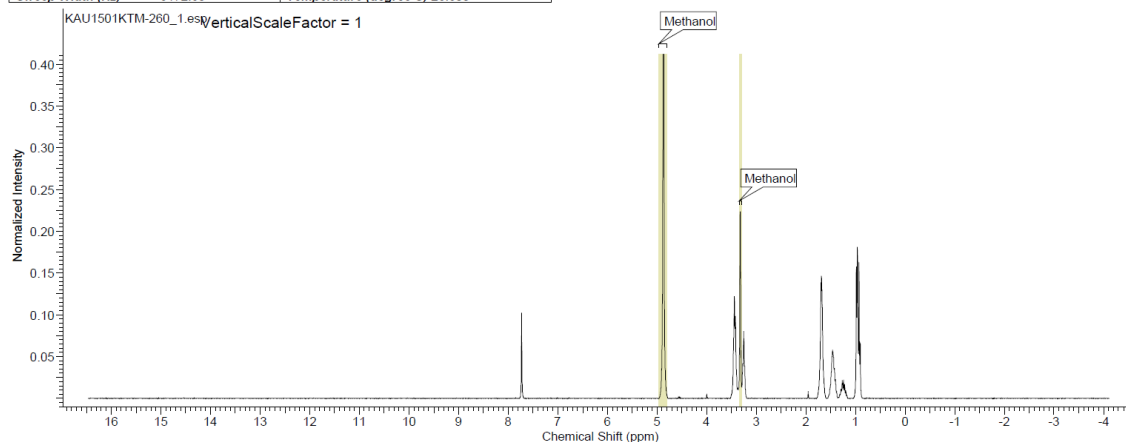

## SpinWorks 4:

CIX-1086668, KAU1501KTM-260\_1, 2016-01-05 13:40:39.0, 13C, CD3OD - Methanol-D4 @ 236496

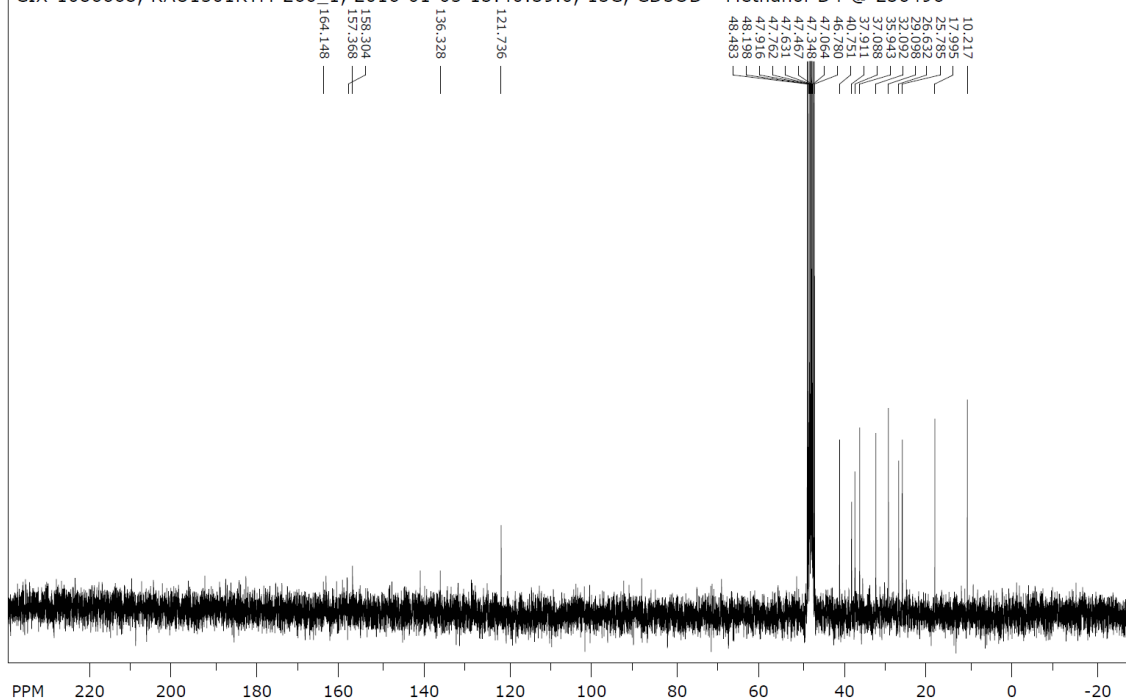

Peak ID Time Mass Found  
6 1.84 351.24  
6: (Time: 1.86)

5.3e+005

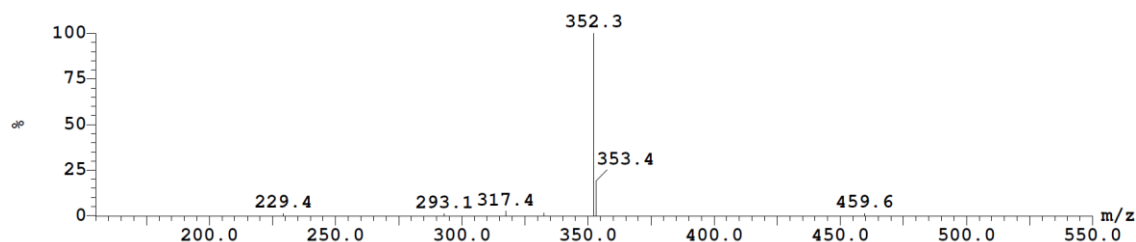

## MOC-33

This report was created by ACD/NMR Processor Academic Edition. For more information go to [www.acdlabs.com/nmrproc/](http://www.acdlabs.com/nmrproc/)

5/8/2017 8:06:31 AM

|                        |                                                                                                       |                        |                                                                 |                      |           |
|------------------------|-------------------------------------------------------------------------------------------------------|------------------------|-----------------------------------------------------------------|----------------------|-----------|
| Acquisition Time (sec) | 2.6477                                                                                                | Comment                | CIX-1080568, KAU1501KTM-211 1, 1H, CD3OD - Methanol-D4 @ 219295 |                      |           |
| Date                   | 22 Oct 2015 11:50:56                                                                                  | Date Stamp             | 22 Oct 2015 11:50:56                                            |                      |           |
| File Name              | C:\Users\imtk0005\Google Drive\KAU\IMEI-Araby\12-BIO3193-03 Imidazole Cpd\1H-NMR\KAU1501KTM-211_1.fid |                        | Frequency (MHz)                                                 | 300.13               |           |
| Nucleus                | 1H                                                                                                    | Number of Transients   | 8                                                               | Origin               | spect     |
| Owner                  | Administrator                                                                                         | Points Count           | 16384                                                           | Pulse Sequence       | zg        |
| SW (cycles) (Hz)       | 6188.12                                                                                               | Solvent                | METHANOL-d4                                                     | Receiver Gain        | 512.00    |
| Sweep Width (Hz)       | 6187.74                                                                                               | Temperature (degree C) | 24.160                                                          | Spectrum Offset (Hz) | 1853.6917 |
|                        |                                                                                                       |                        |                                                                 | Spectrum Type        | STANDARD  |

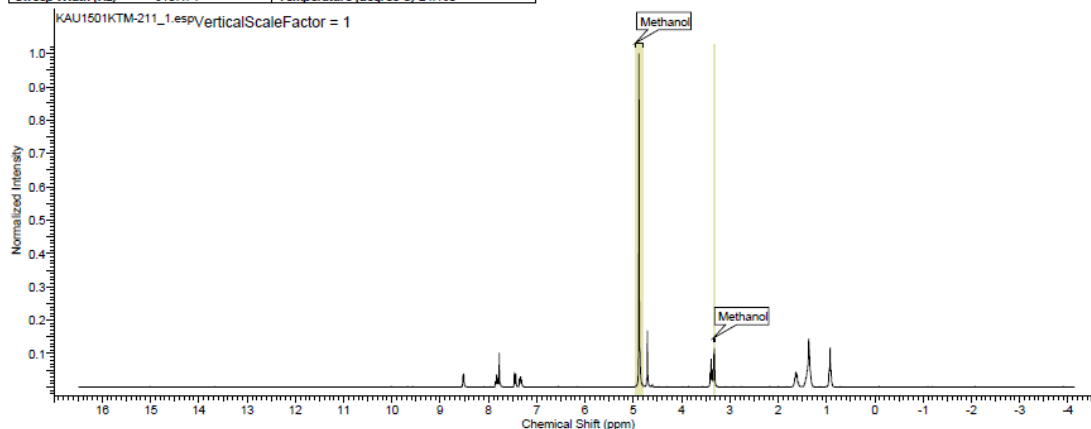

SpinWorks 4: C1X 1000566, RAG1561RM 211\_1, 2016-01-05 15:46:55.8, 150, CDCl<sub>3</sub>, Methanol-d<sub>4</sub> 200472

12.990  
22.278  
25.544  
29.230  
31.324  
38.962  
39.676  
43.676  
46.793  
47.077  
47.661  
47.868  
47.489  
47.645  
47.928  
48.066  
48.107  
48.212  
48.289  
48.376  
48.495  
48.686  
48.702

121.560  
121.863  
121.936  
122.452

136.291  
136.511  
137.498  
141.144

148.440

157.833  
158.611  
163.647  
163.664

PPM

freq. of 0 ppm: 75.467746 MHz  
processed size: 32768 complex points  
LB: 1.000 GF: 0.0000  
Hz/cm: 613.961 ppm/cm: 8.13456

3.6e+006

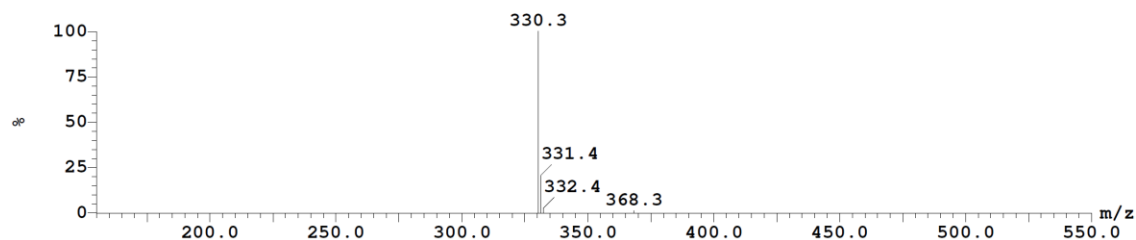

```
1:MS AP+
8.5e+005
```

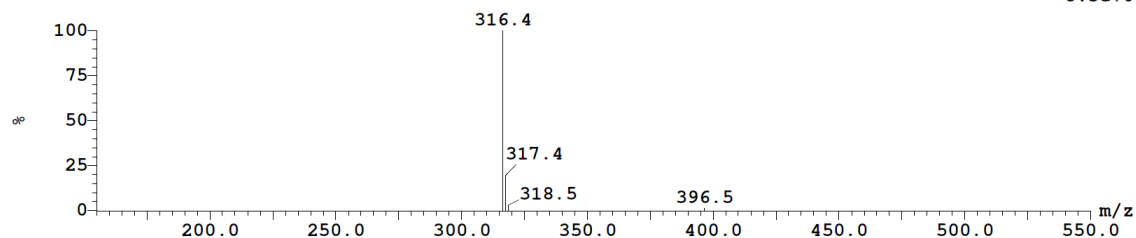

### S3. Competition Assays of MOC Compounds with NS4A

Determination of NS4A<sub>21-34</sub> binding affinity

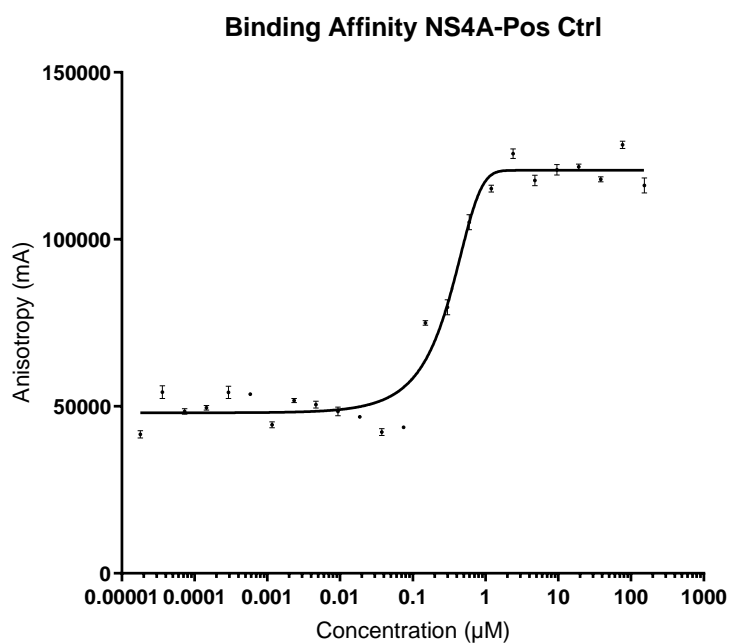

**Figure S3. Fluorescence assay for binding of NS4A<sub>21-34</sub> to NS3 (Genotype 4).**

### S4. Molecular Dynamics



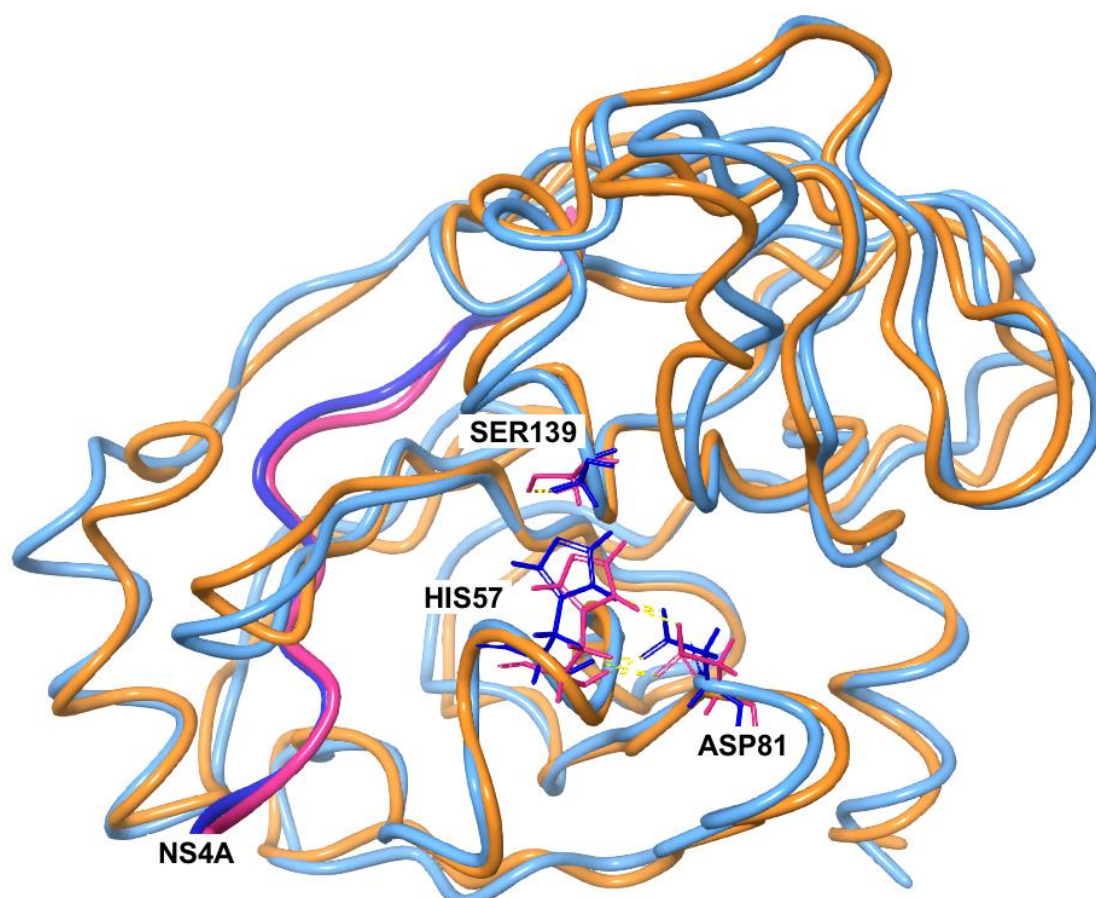

**Figure S4-A:** The crystal structure of Ns3 complexed with NS4A21'-32' was downloaded and prepared according to Protein Preparation protocol described in the Experimental Section 4.3.2. Note hydrogen bonding reserved in the catalytic triad His-57, Asp-81 and Ser-139.

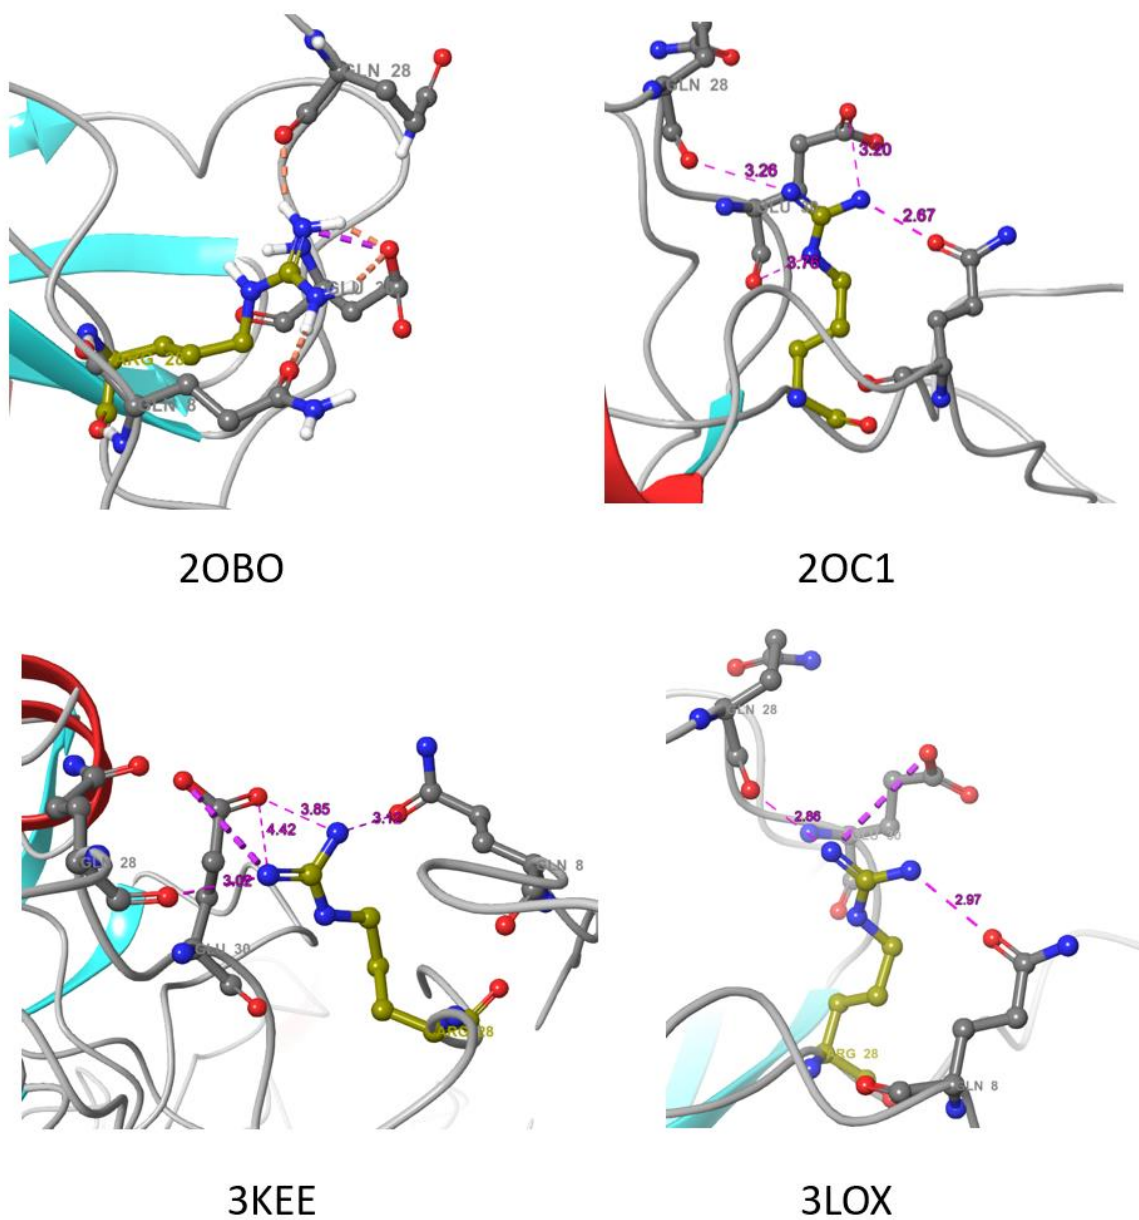

**Figure S4-B.** Interactions of Arg-28` terminal guanidine at four different reported NS3/4A crystal structures (PDB code are printed under each corresponding image). Note that it commonly makes ionic interactions with Glu-30 and hydrogen bonding with Gln-8 and Gln-28 but in different conformations.

SCHRODINGER

### Protein Secondary Structure

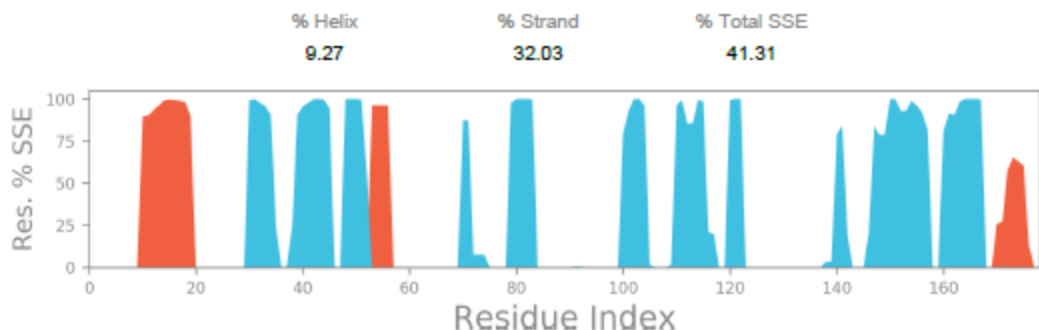

Protein secondary structure elements (SSE) like **alpha-helices** and **beta-strands** are monitored throughout the simulation. The plot above reports SSE distribution by residue index throughout the protein structure. The plot below summarizes the SSE composition for each trajectory frame over the course of the simulation, and the plot at the bottom monitors each residue and its SSE assignment over time.

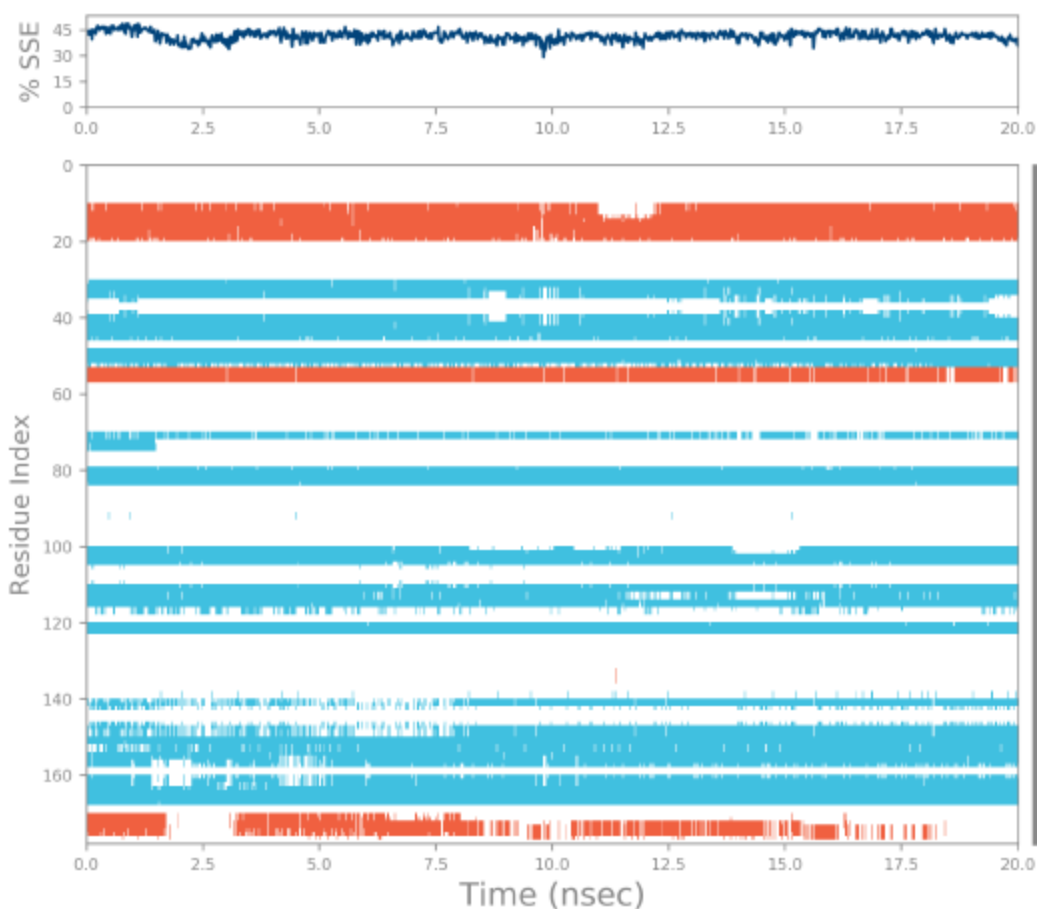

**Figure S4-C.** Report generated by Desmond on the secondary structure of the NS3 apoprotein during the MD simulation time. The preservation of secondary structure relates the quality of the model because a loss of secondary structure during conformational excitation would mean low quality of the binding model.
